# Supplementary material for: Design, synthesis, bioevaluation, and in silico insights of pyrazole-pyrrolinone and pyridazinone hybrids as potential antimicrobial agents
Source: Royal Society of Chemistry journal article supplement (doi:10.1039/d6ra02508k), 2026-05-14
Supplement: d6ra02508k2.pdf [file d6ra02508k2.pdf]

**Design, Synthesis, Bioevaluation, and *In Silico* Insights of Pyrazole-Pyrrolinone and Pyridazinone Hybrids as Potential Antimicrobial Agents**

**Supporting information:**

**Spectral data:**

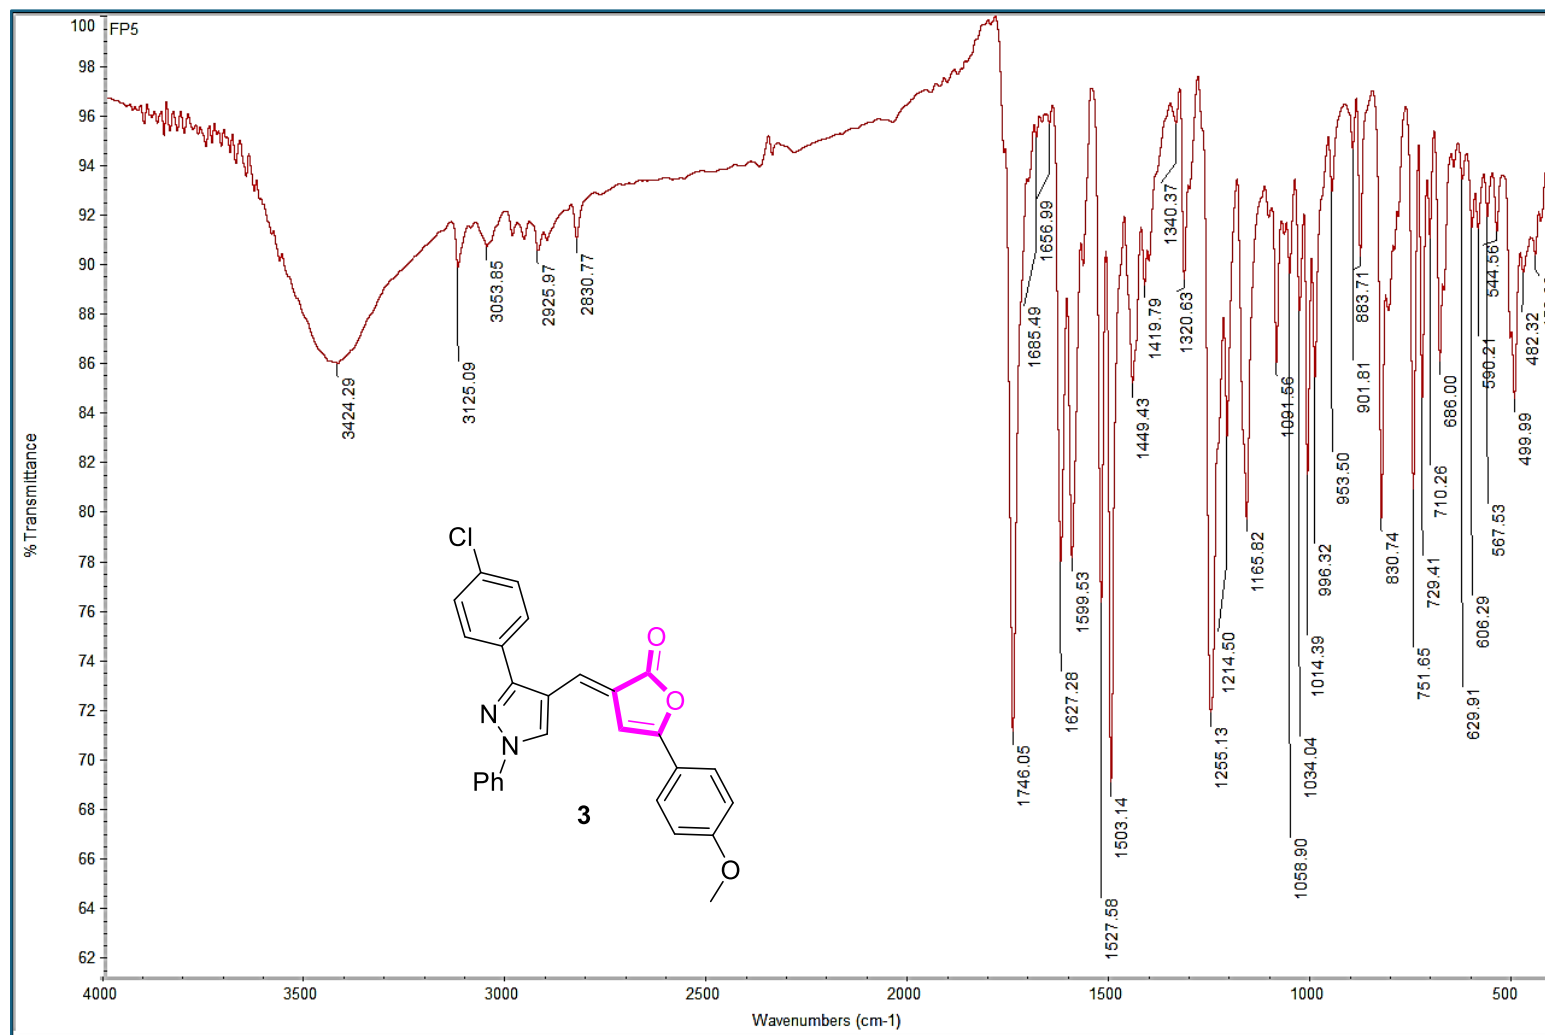

FT-IR spectrum of compound 3

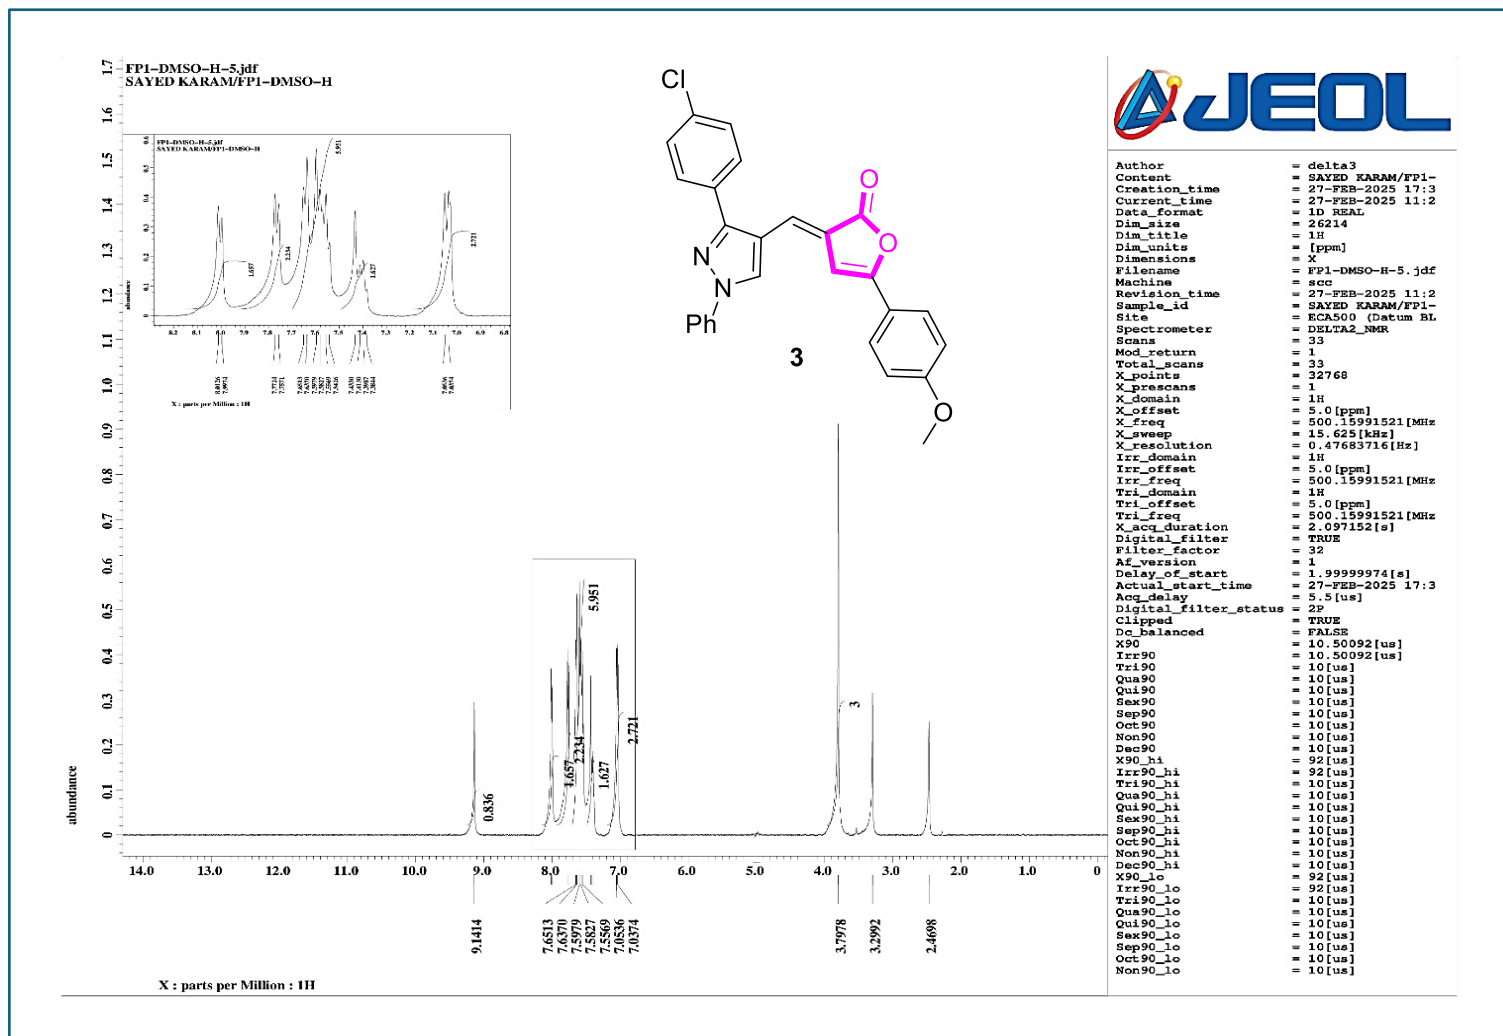

$^1\text{H}$  NMR spectrum (DMSO- $d_6$ ) of compound 3



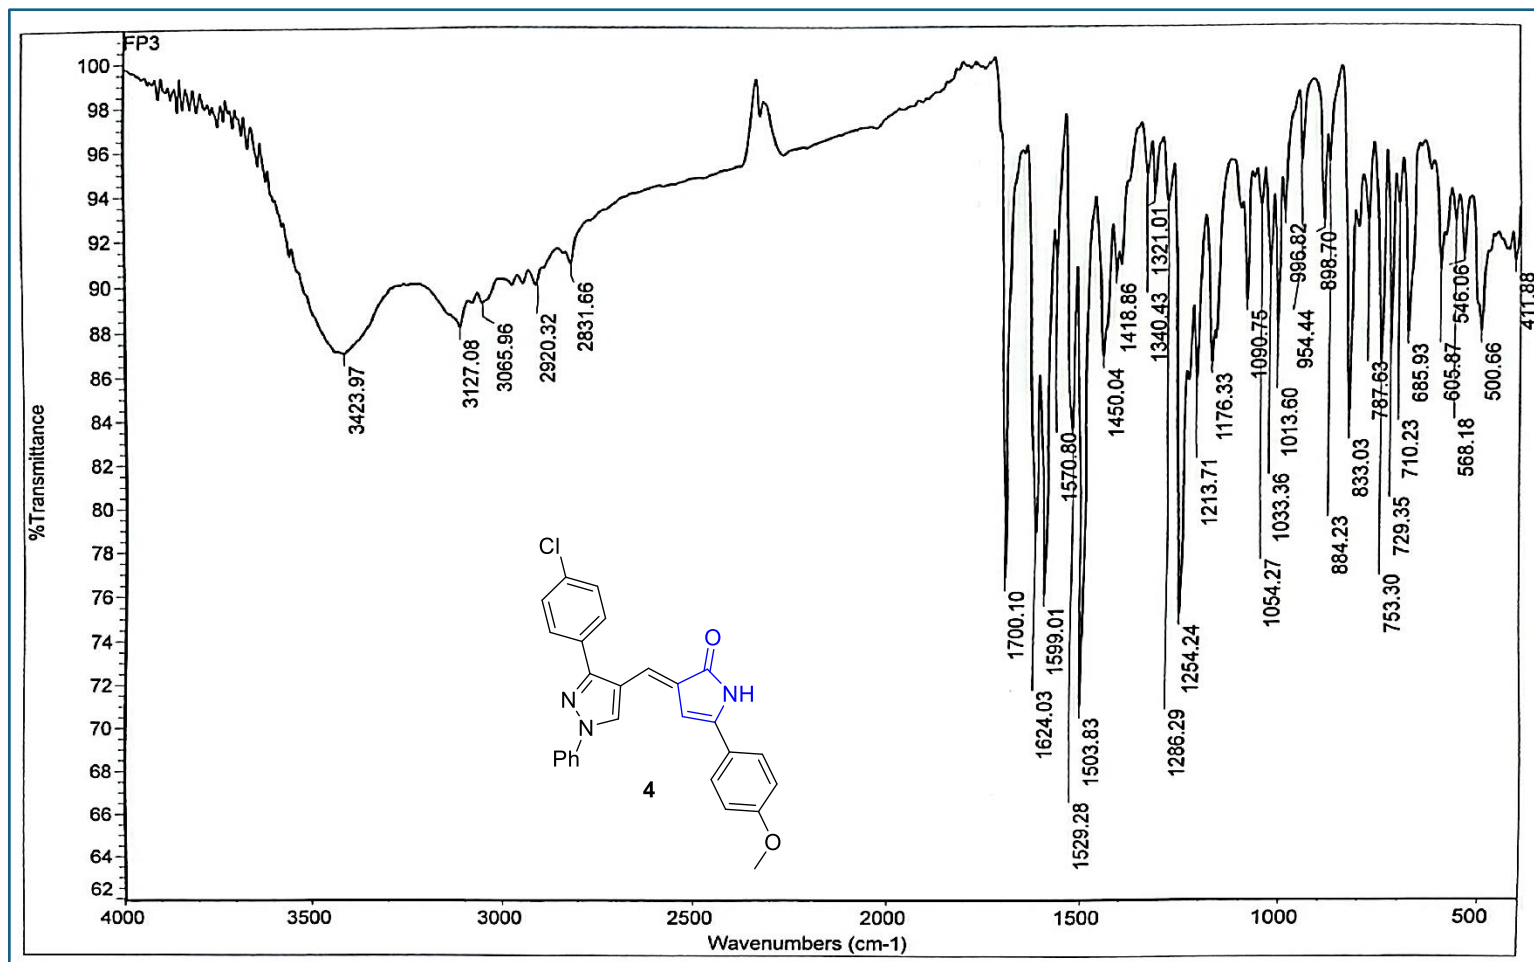

FT-IR spectrum of compound 4



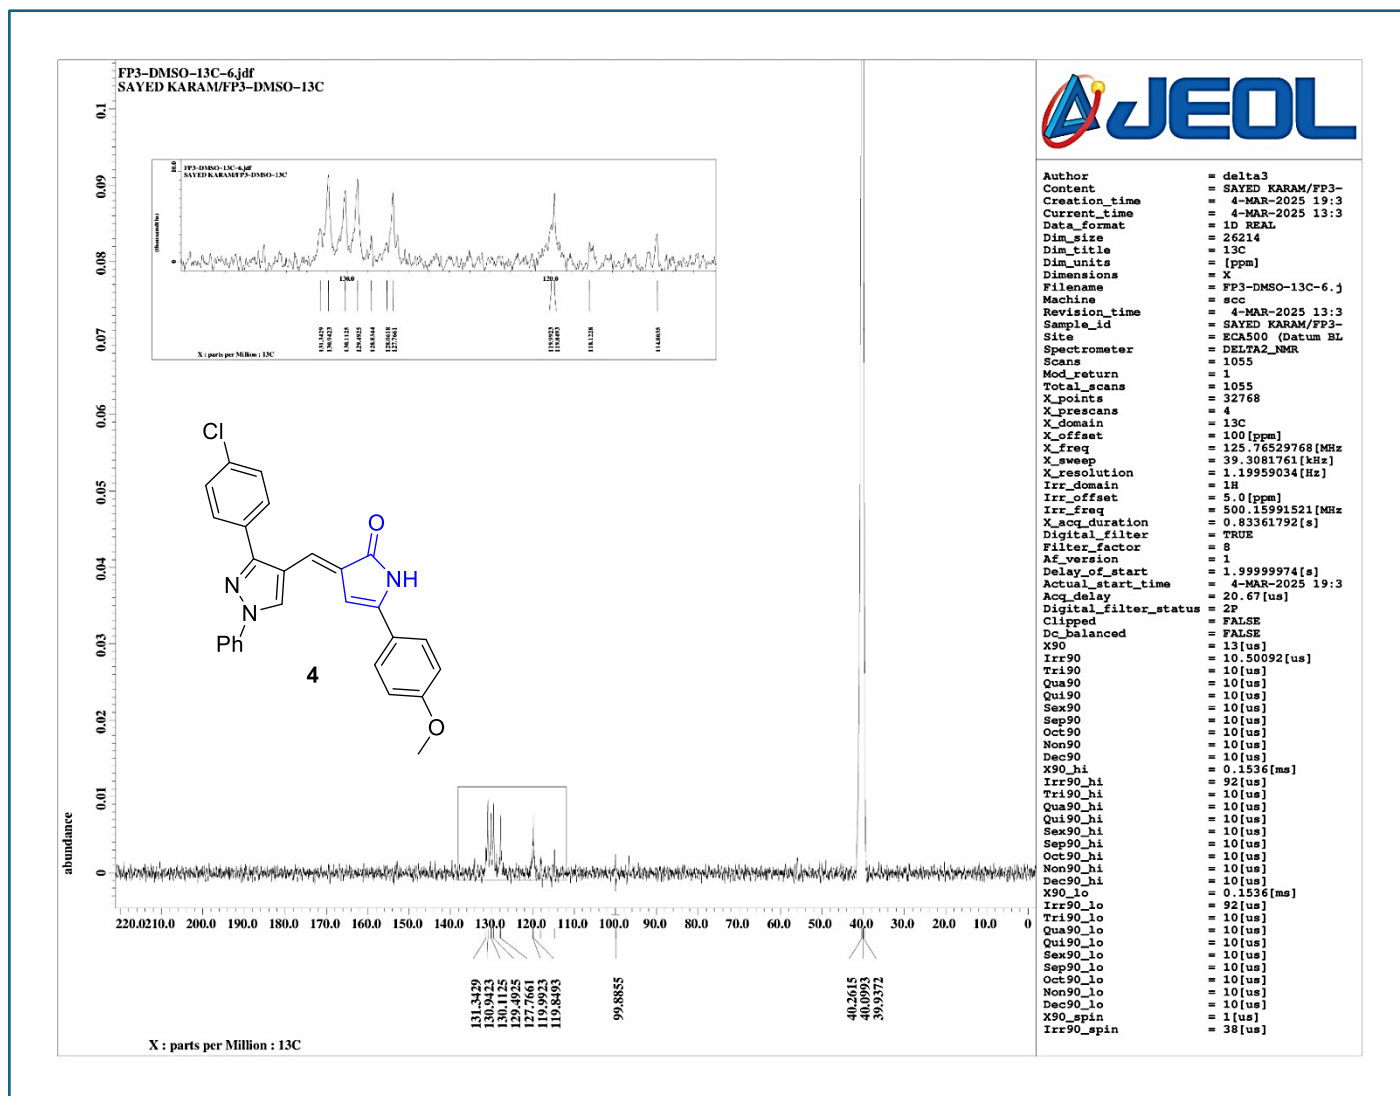

$^{13}\text{C}$  NMR spectrum (DMSO- $d_6$ ) of compound 4

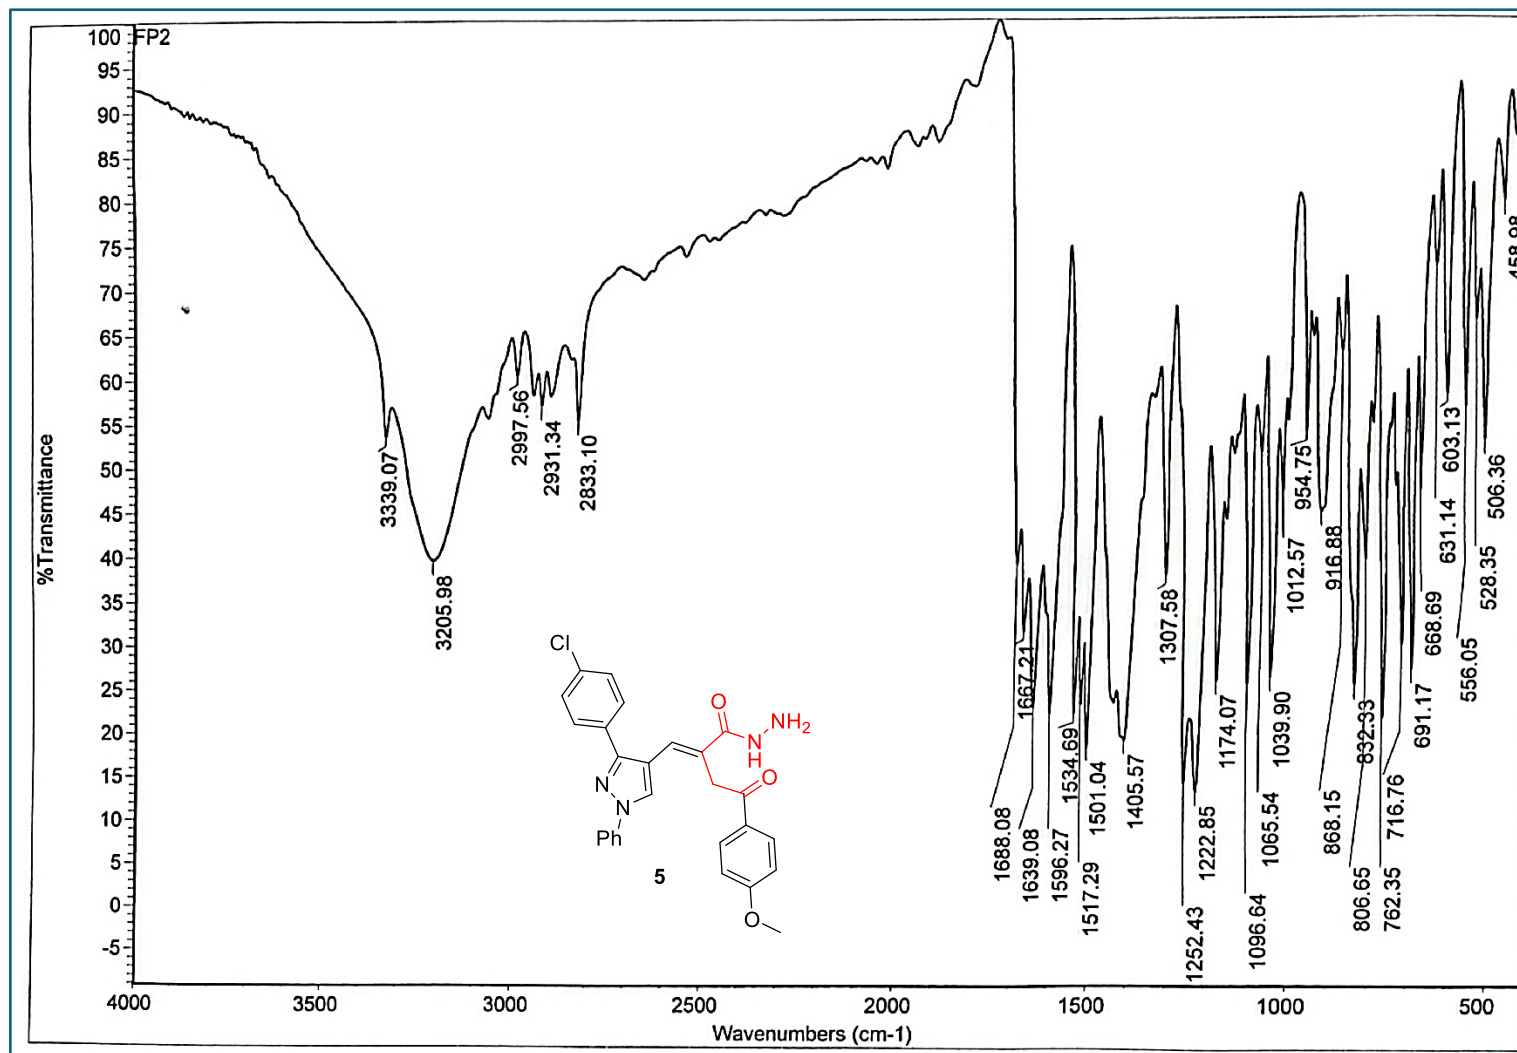

FT-IR spectrum of compound 5

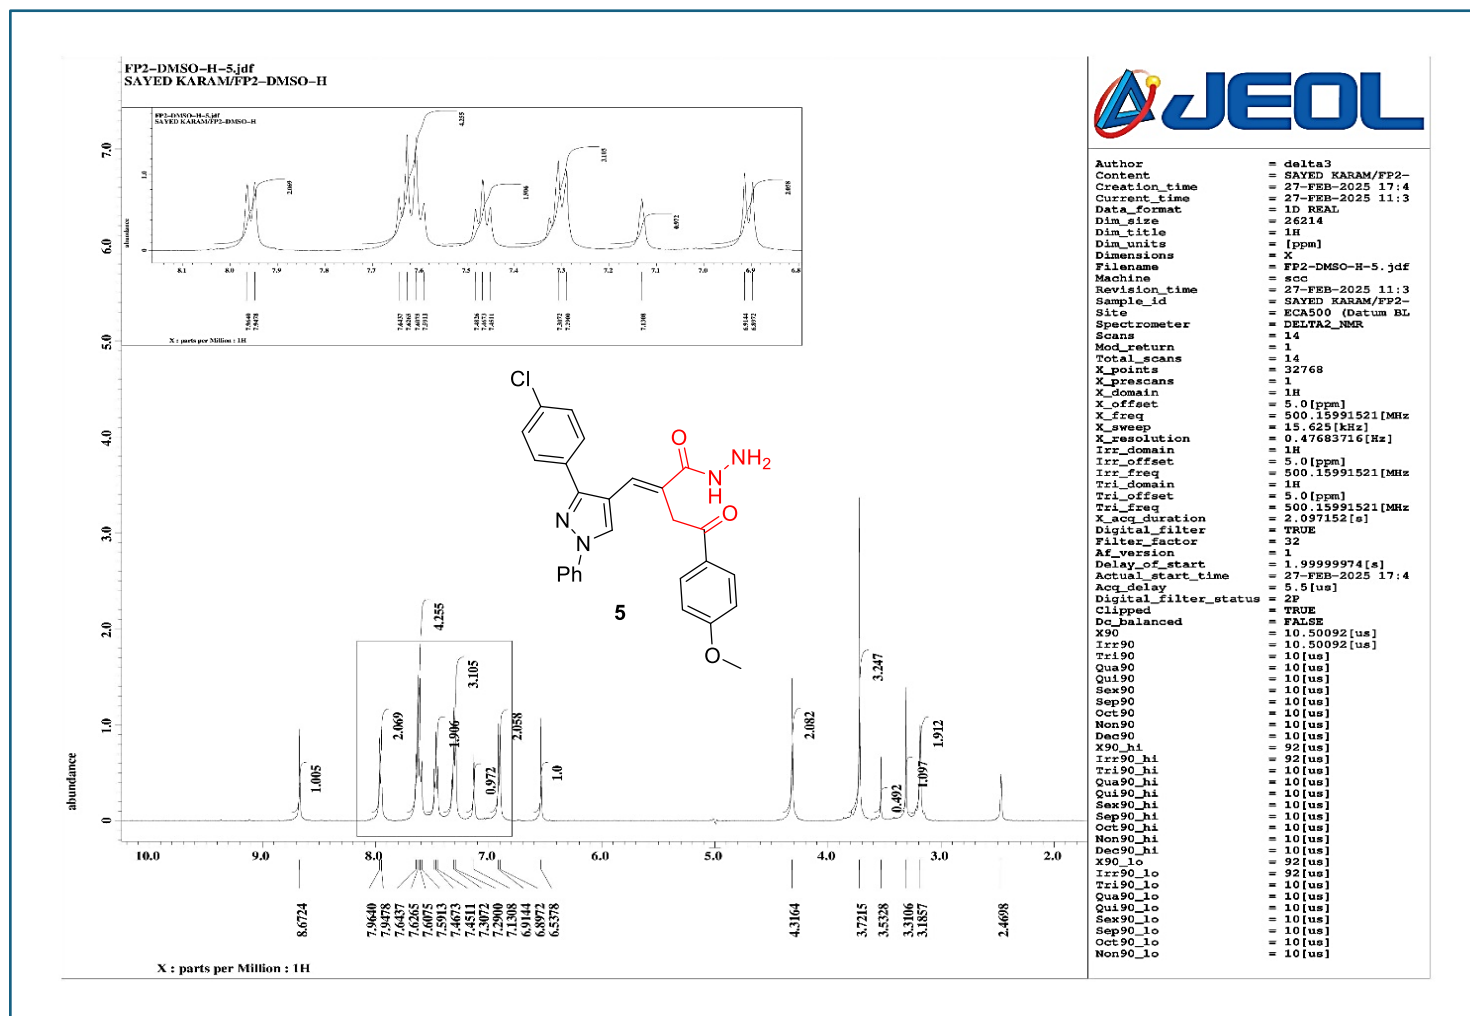

$^1\text{H}$  NMR spectrum (DMSO- $d_6$ ) of compound 5

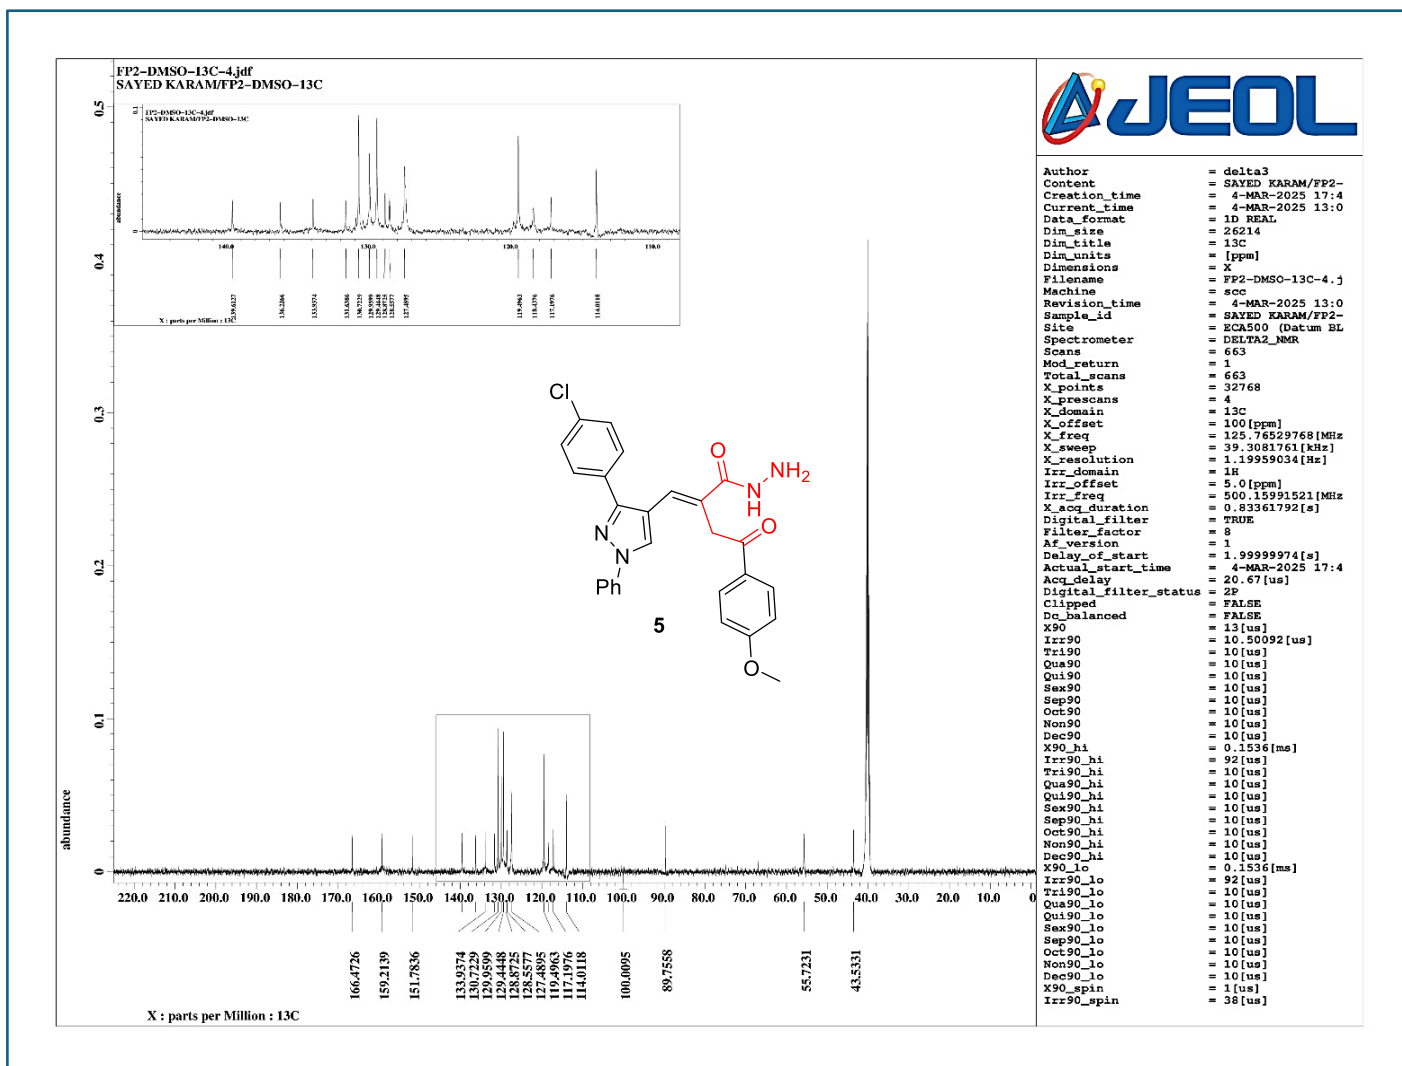

$^{13}\text{C}$  NMR spectrum (DMSO- $d_6$ ) of compound 5

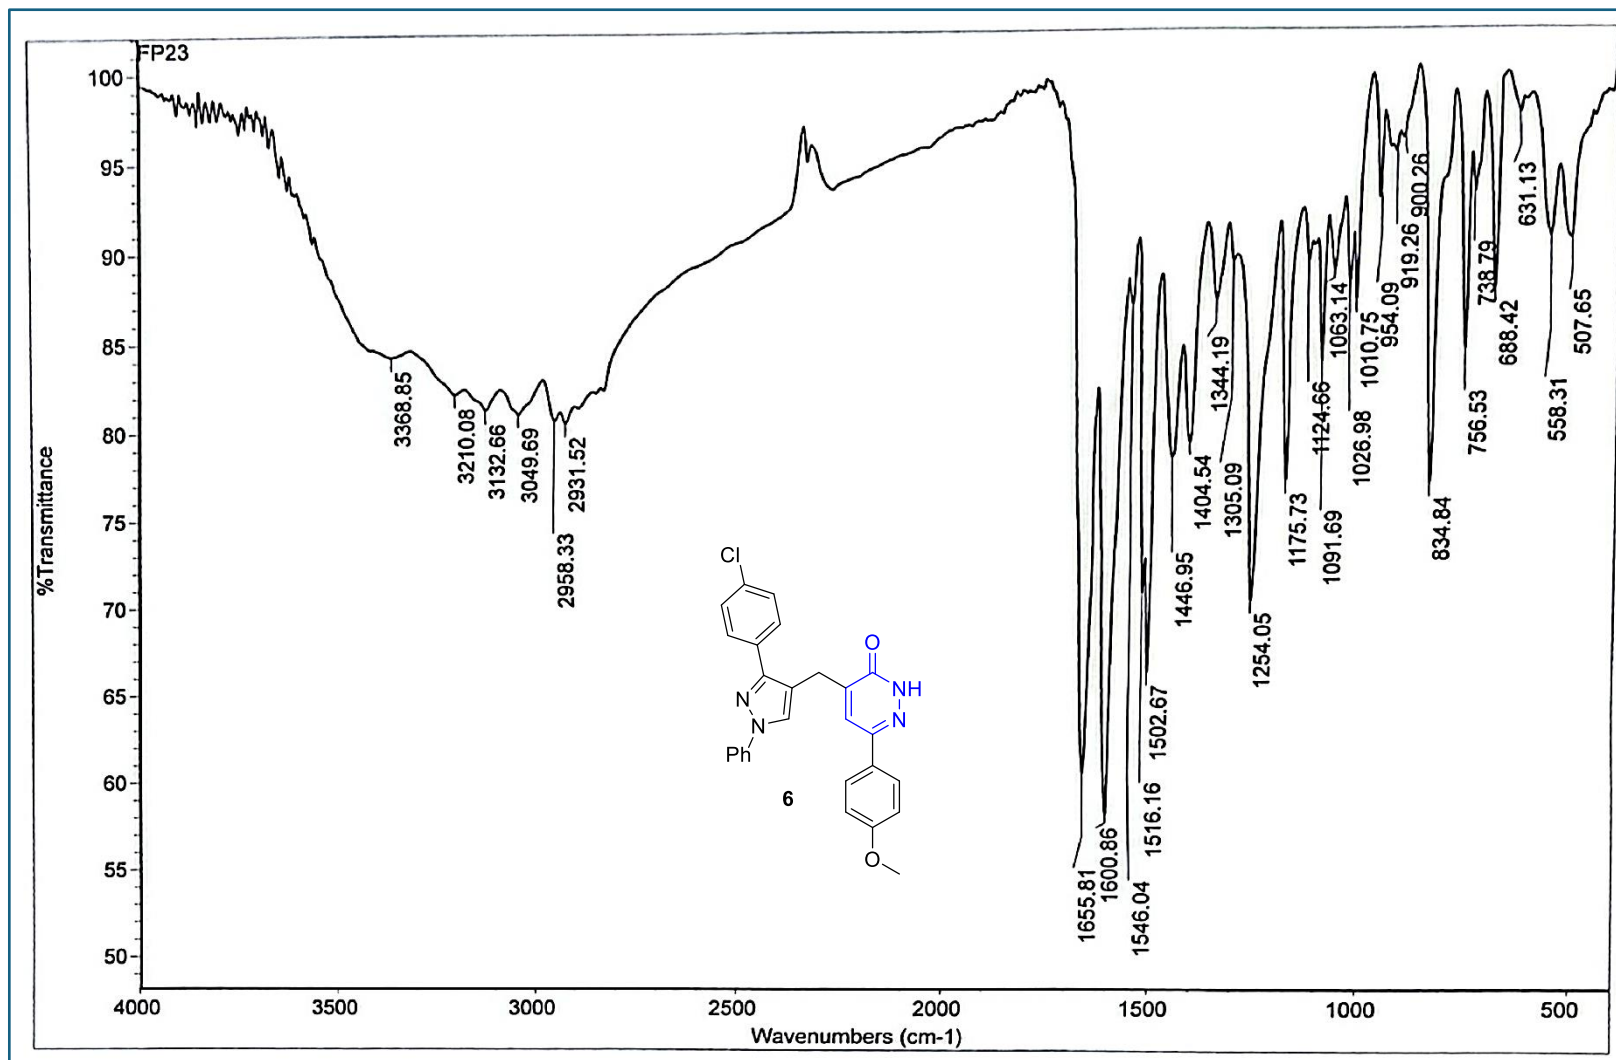

FT-IR spectrum of compound 6

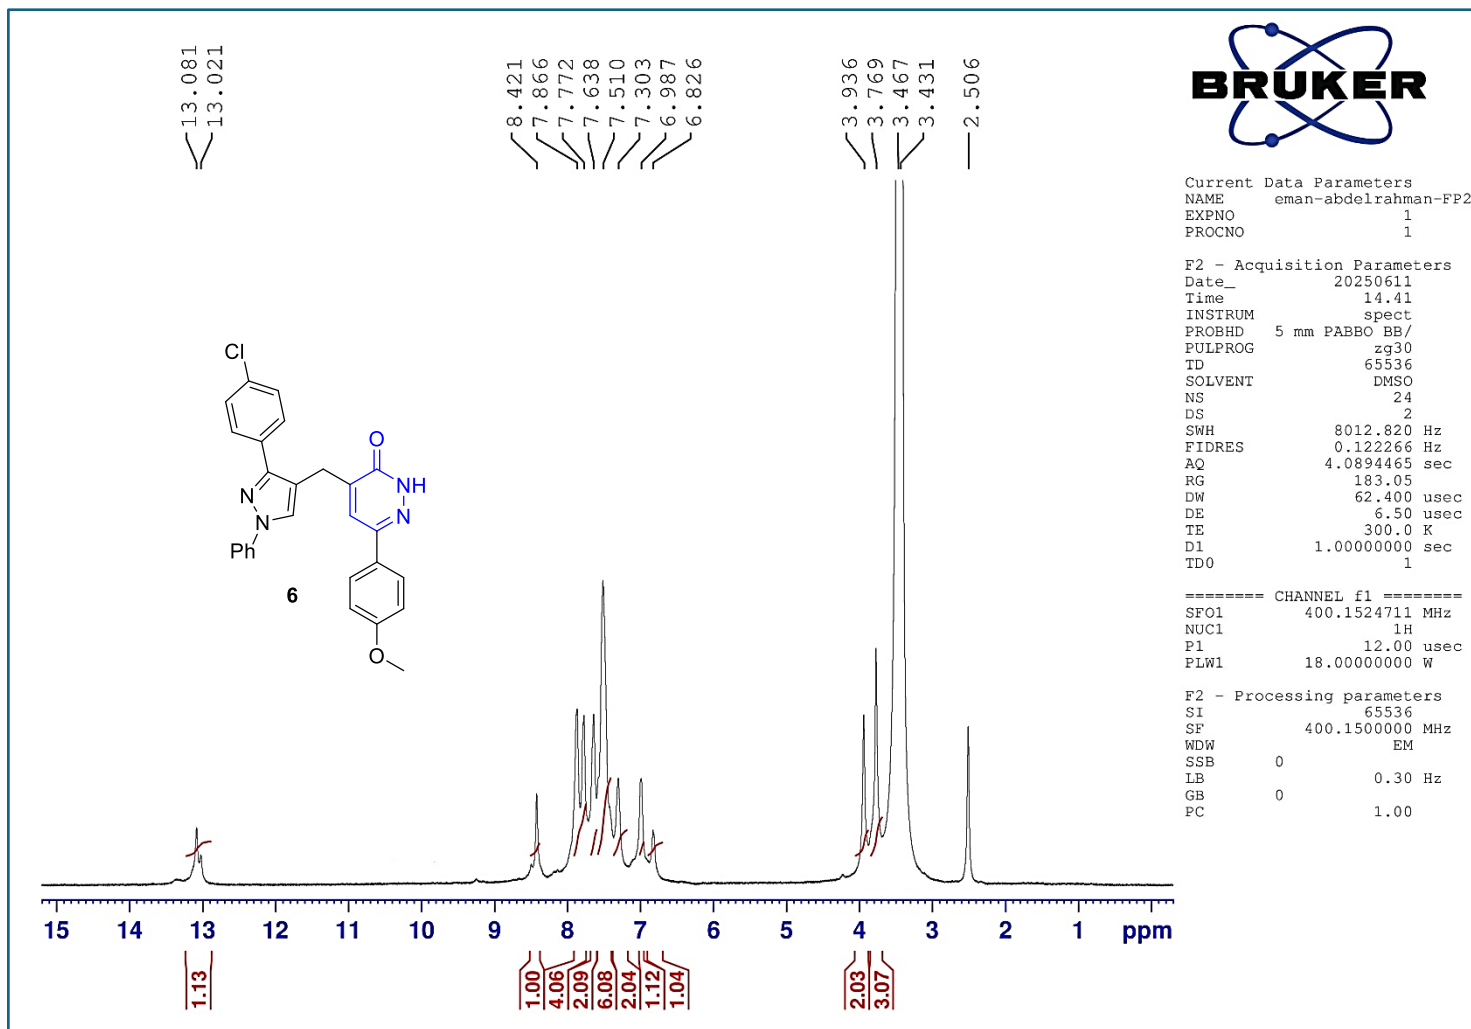

$^1\text{H}$  NMR spectrum (DMSO- $d_6$ ) of compound 6

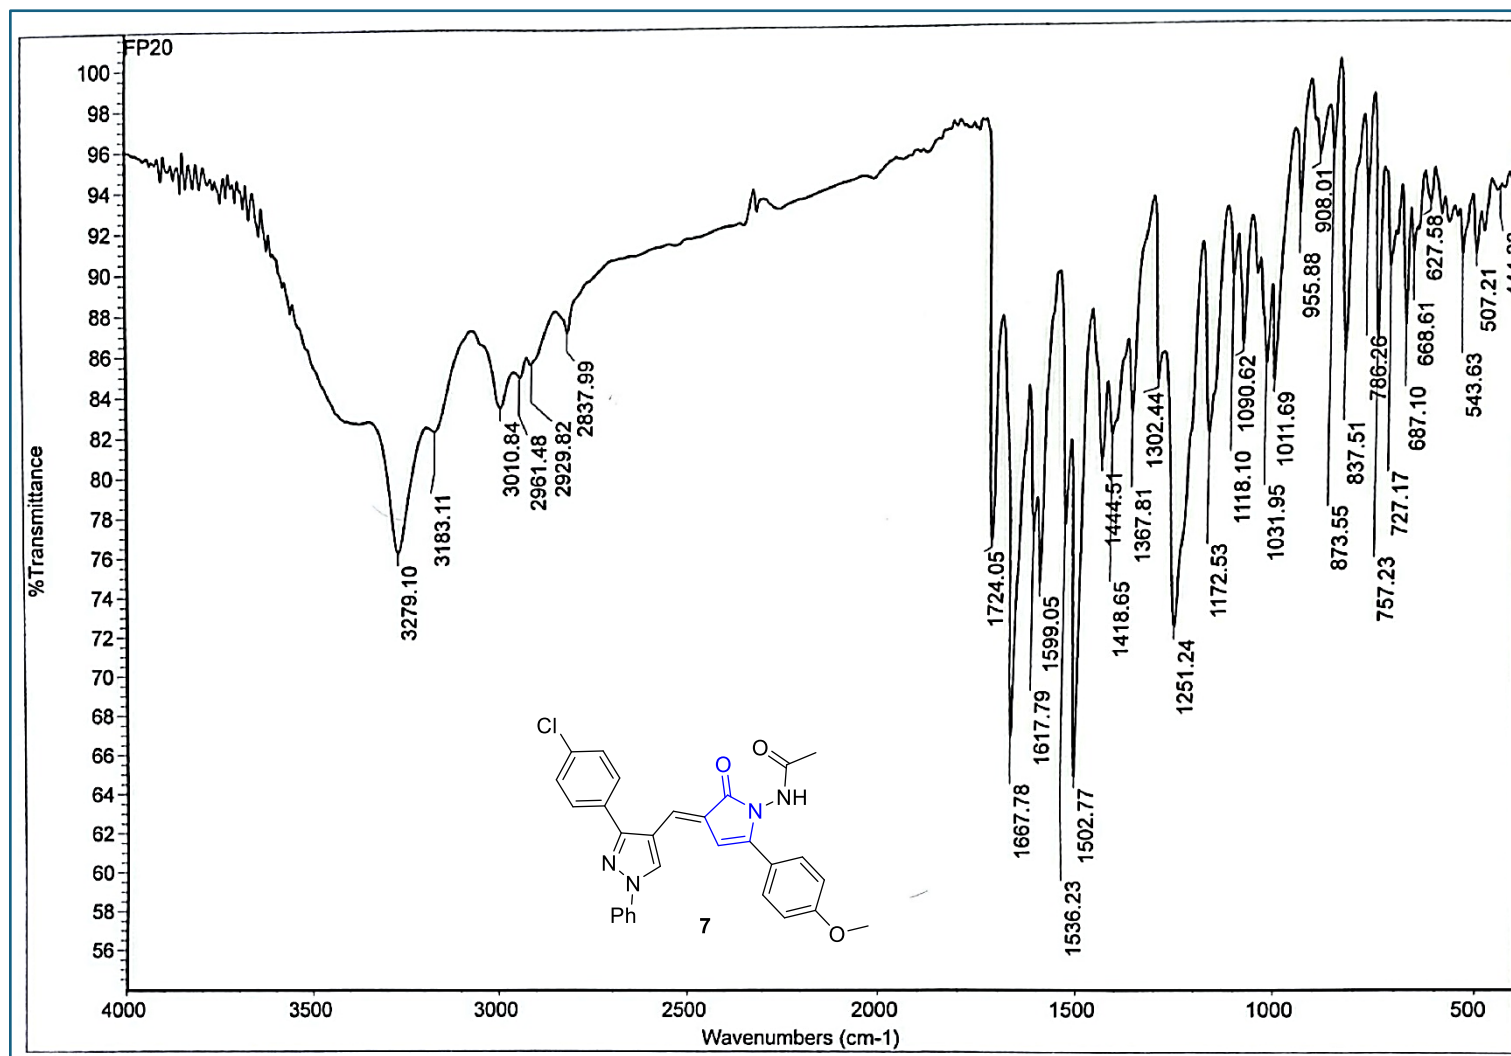

FT-IR spectrum of compound 7

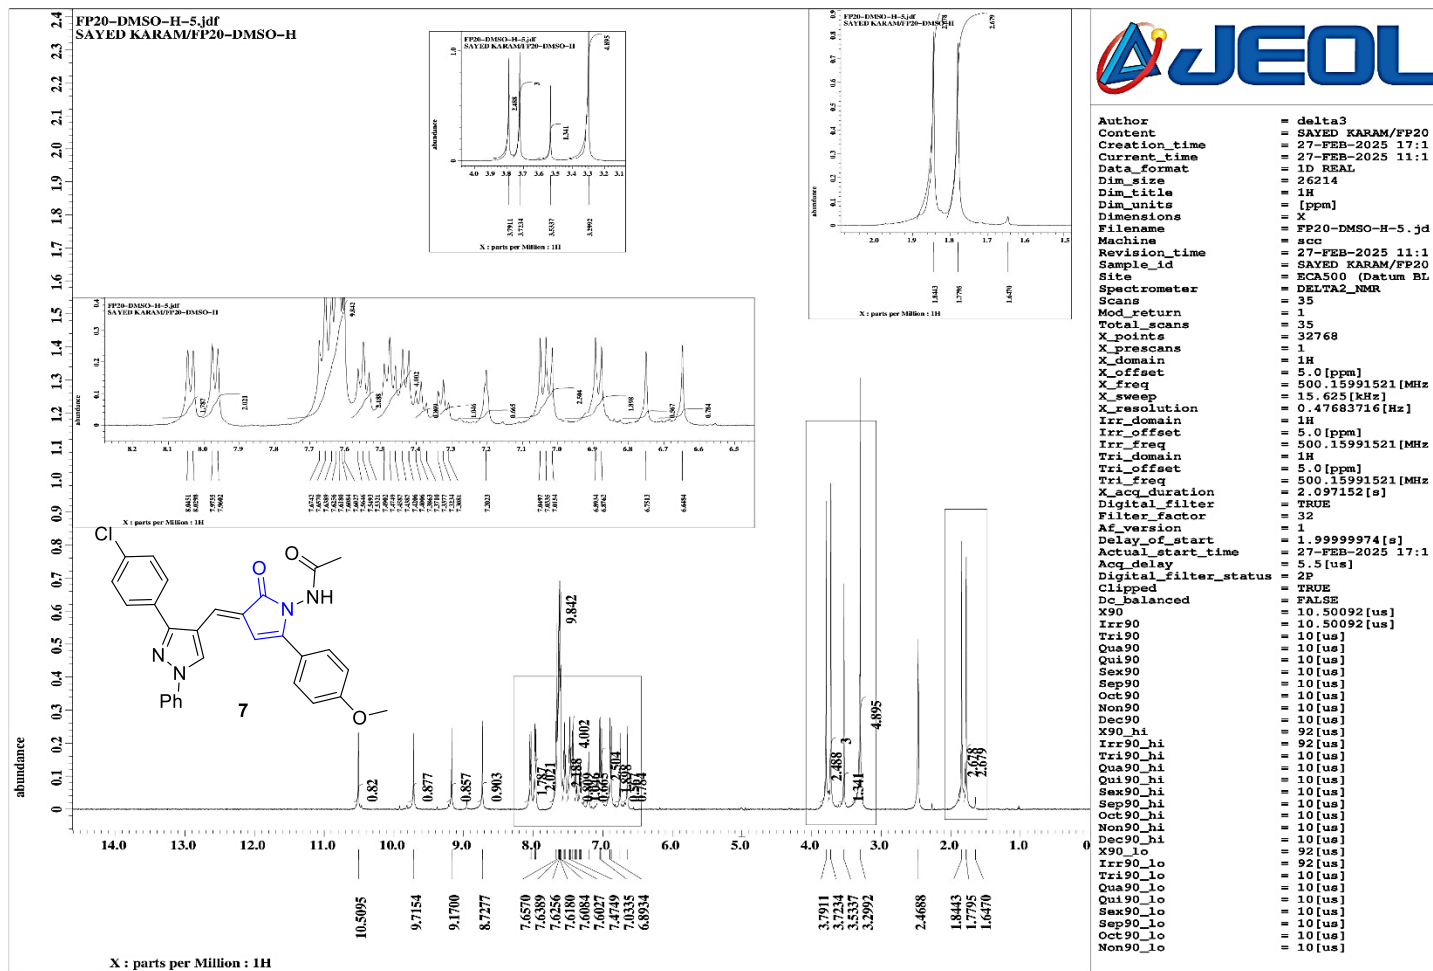

$^1\text{H}$  NMR spectrum (DMSO- $d_6$ ) of compound 7

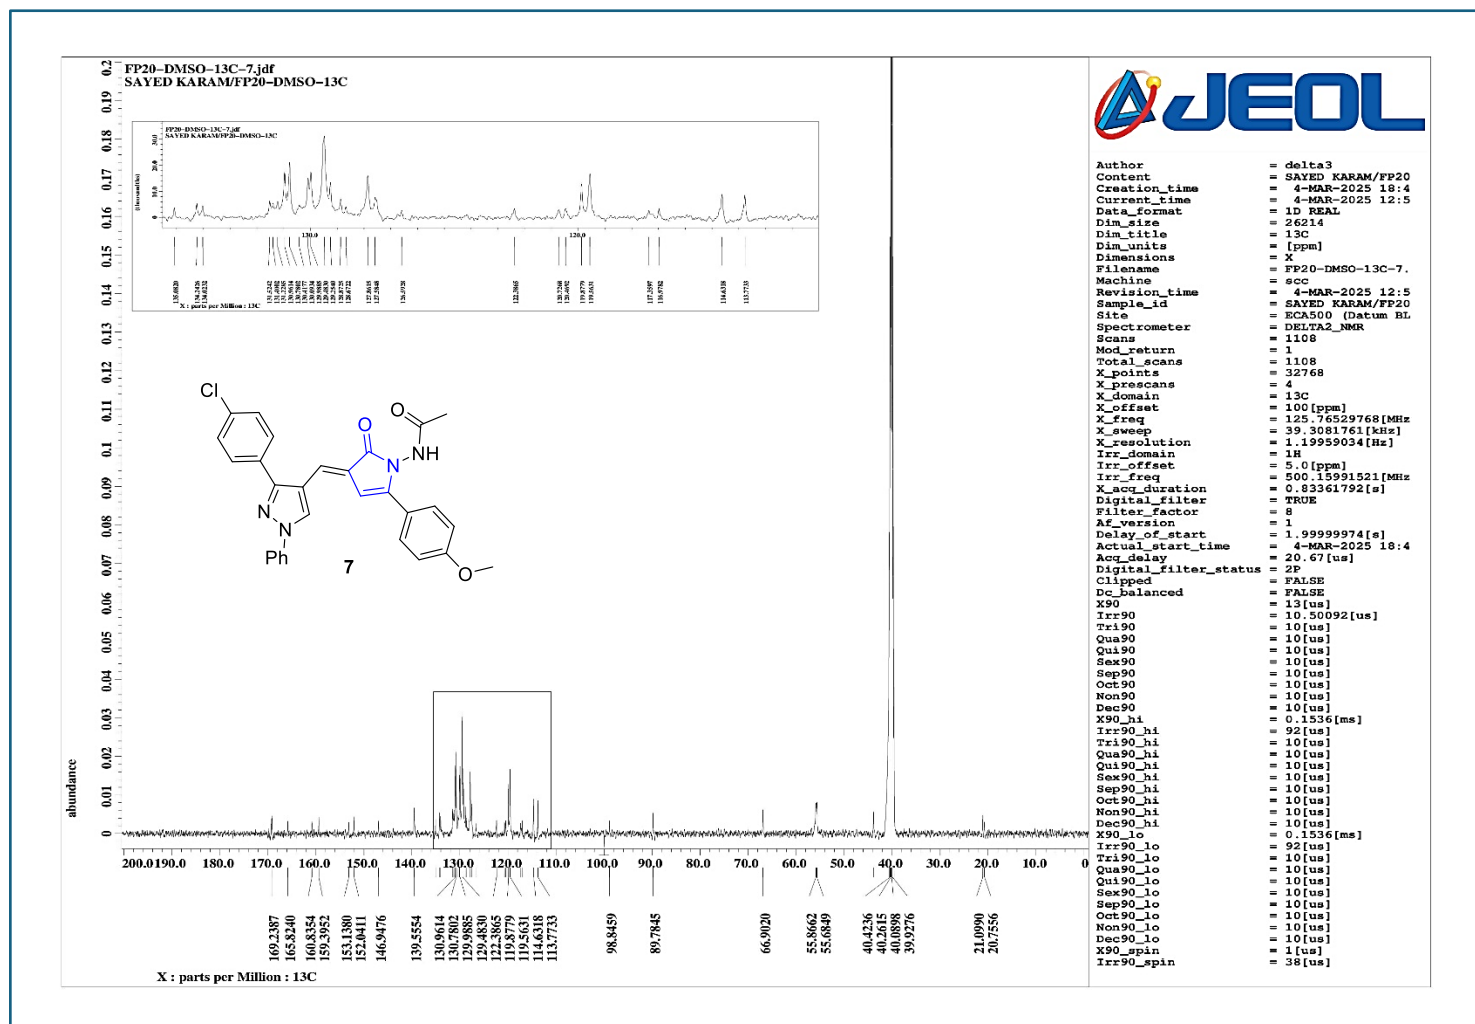

$^{13}\text{C}$  NMR spectrum (DMSO- $d_6$ ) of compound 7

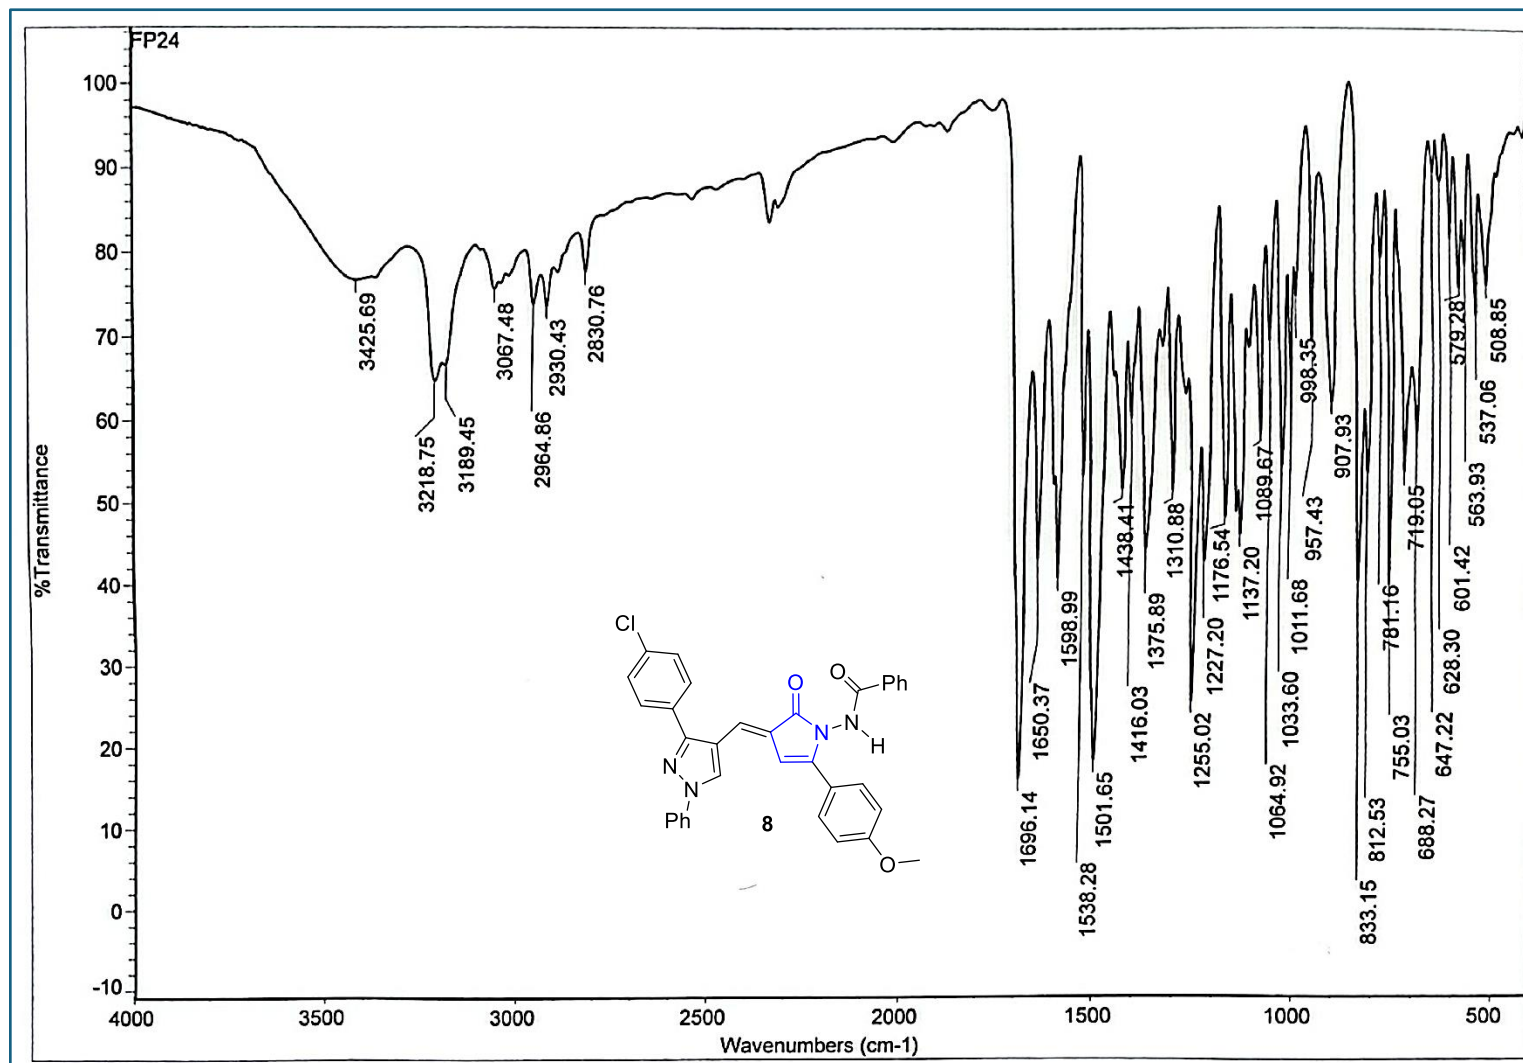

FT-IR spectrum of compound 8

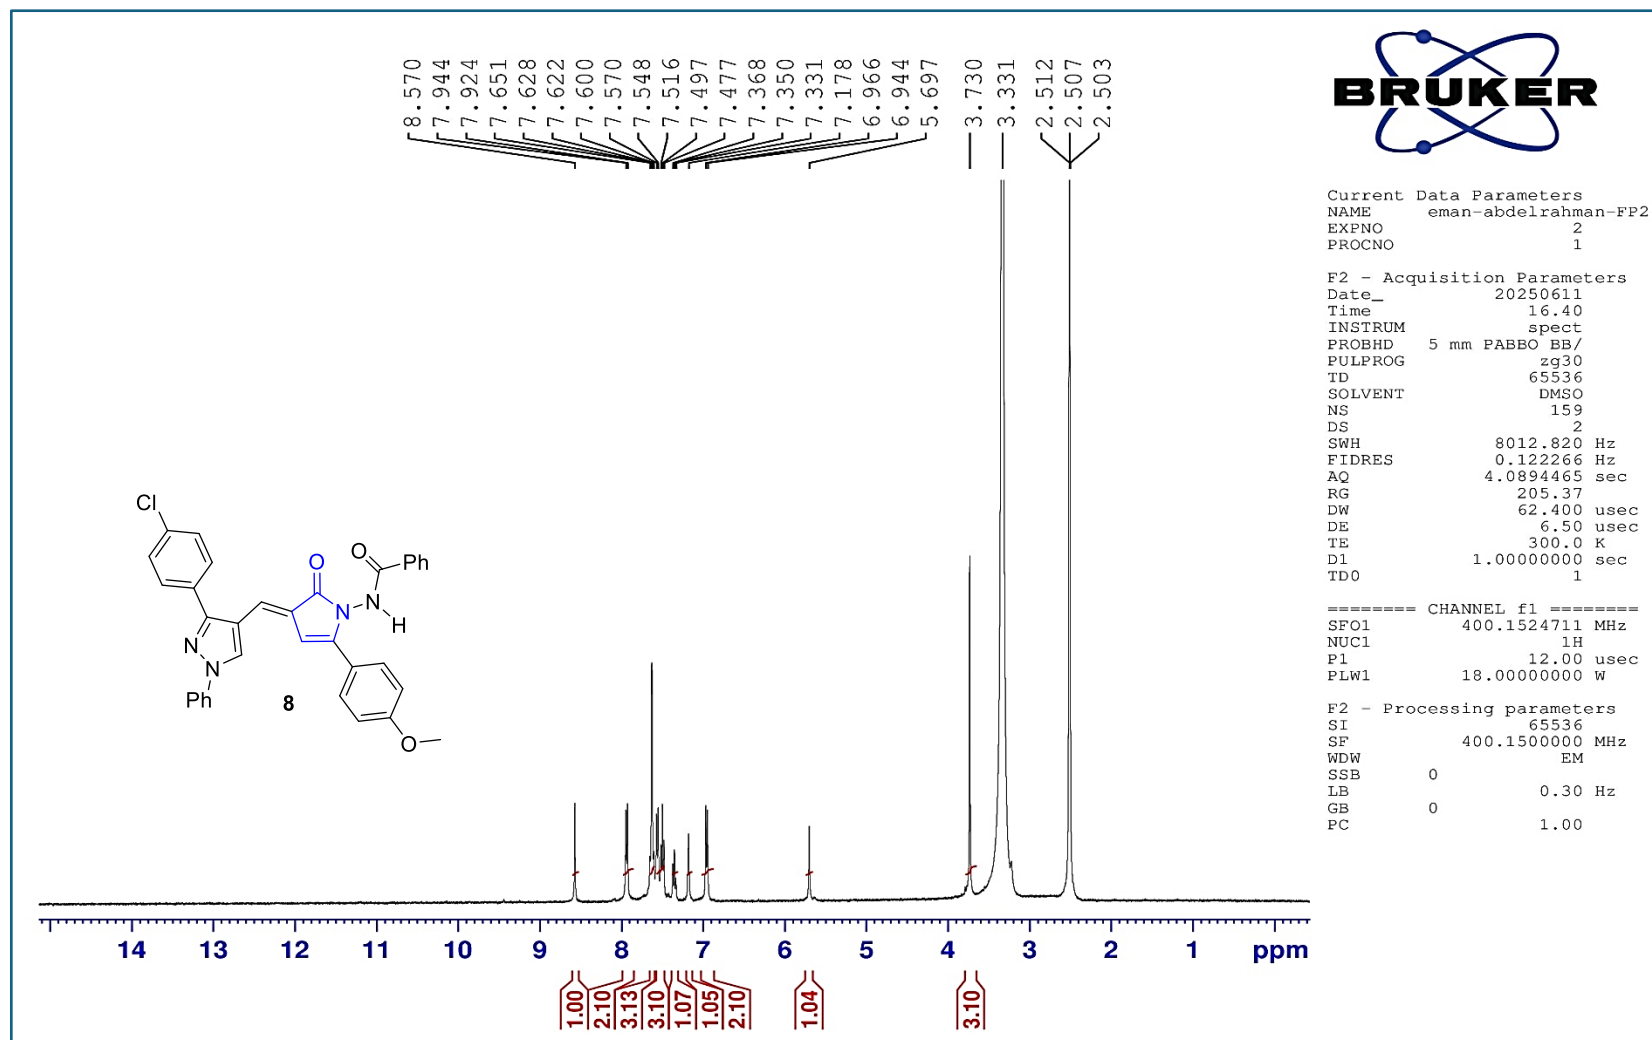

<sup>1</sup>H NMR spectrum (DMSO-*d*<sub>6</sub>) of compound 8

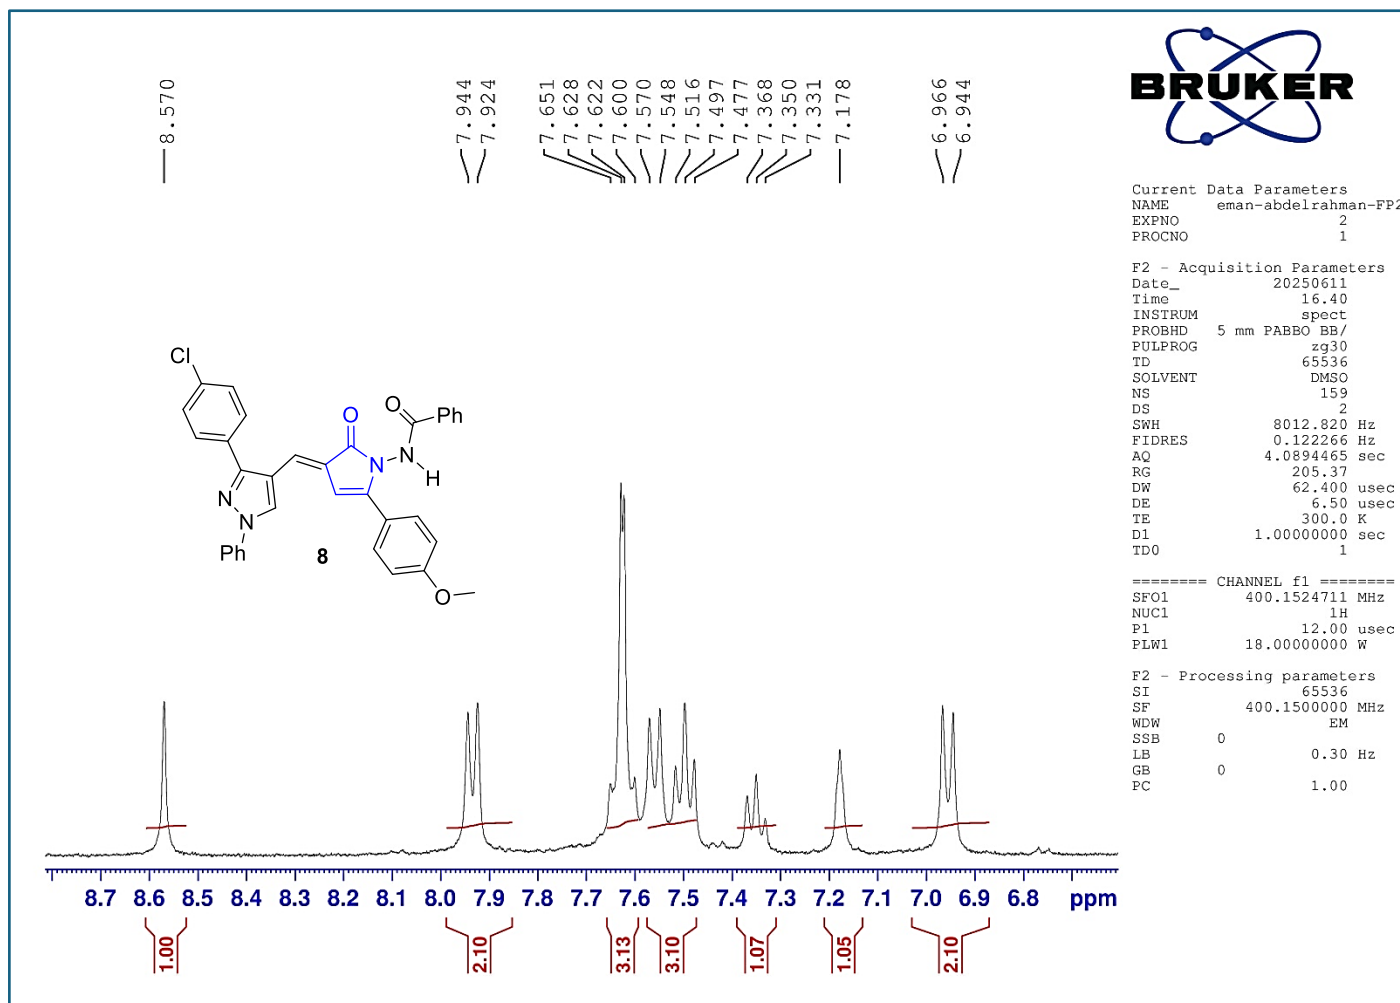

Cont.  $^1\text{H}$  NMR spectrum ( $\text{DMSO-}d_6$ ) of compound 8

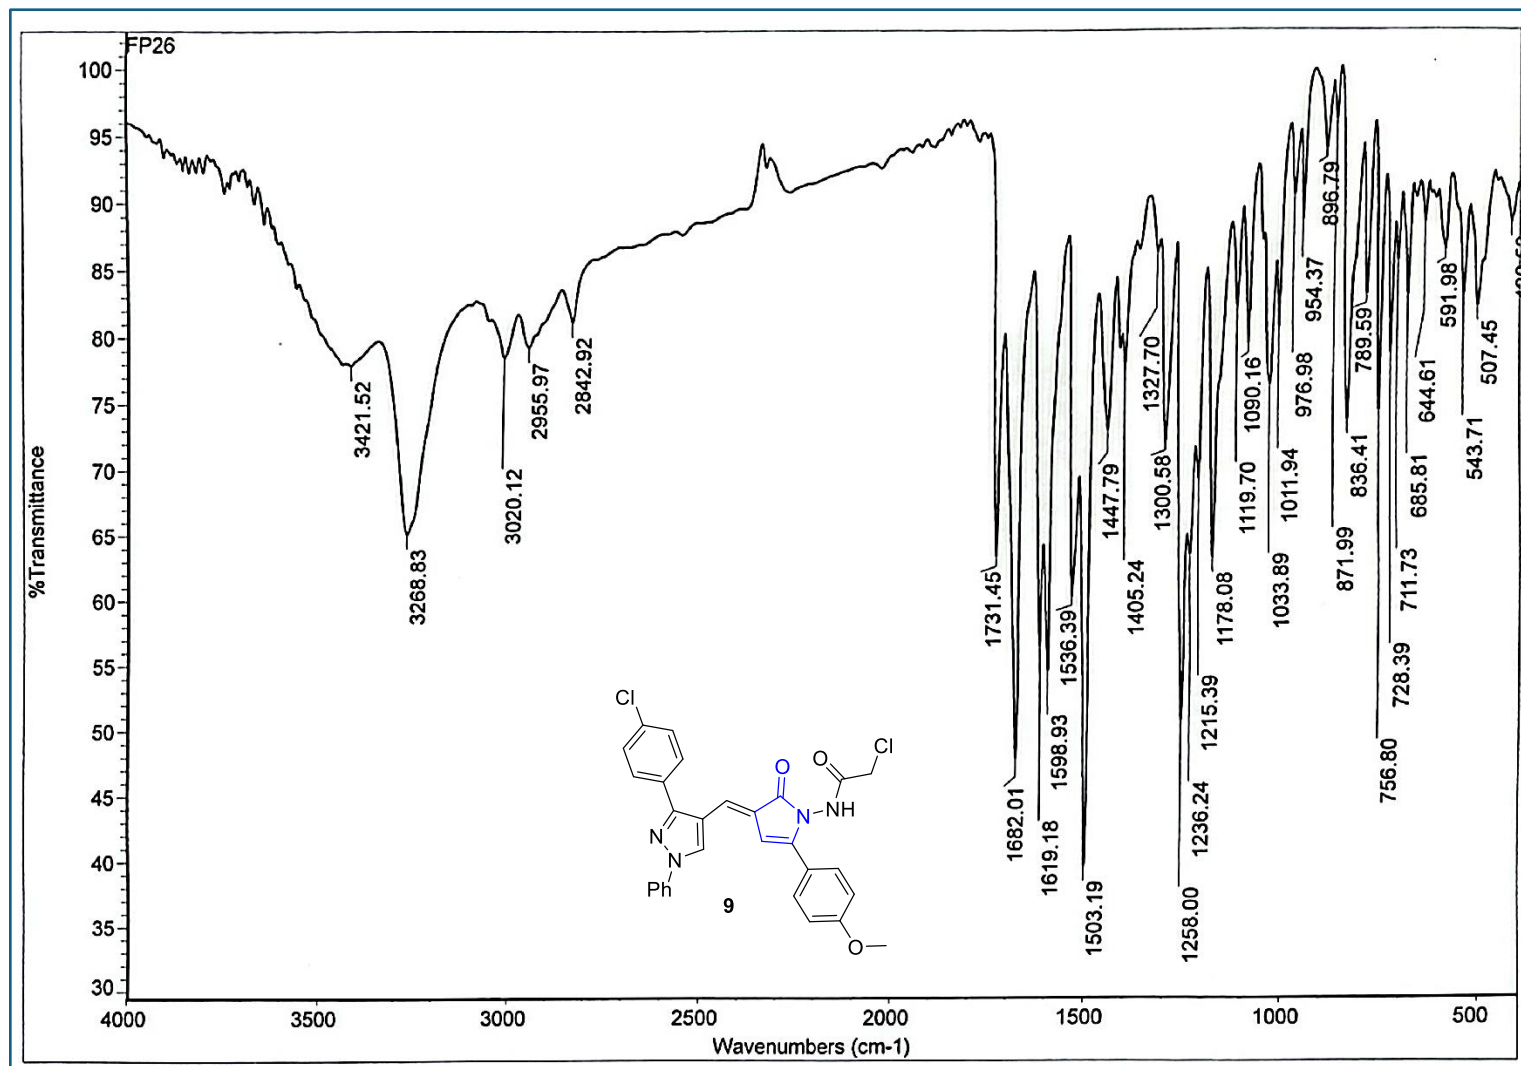

FT-IR spectrum of compound 9

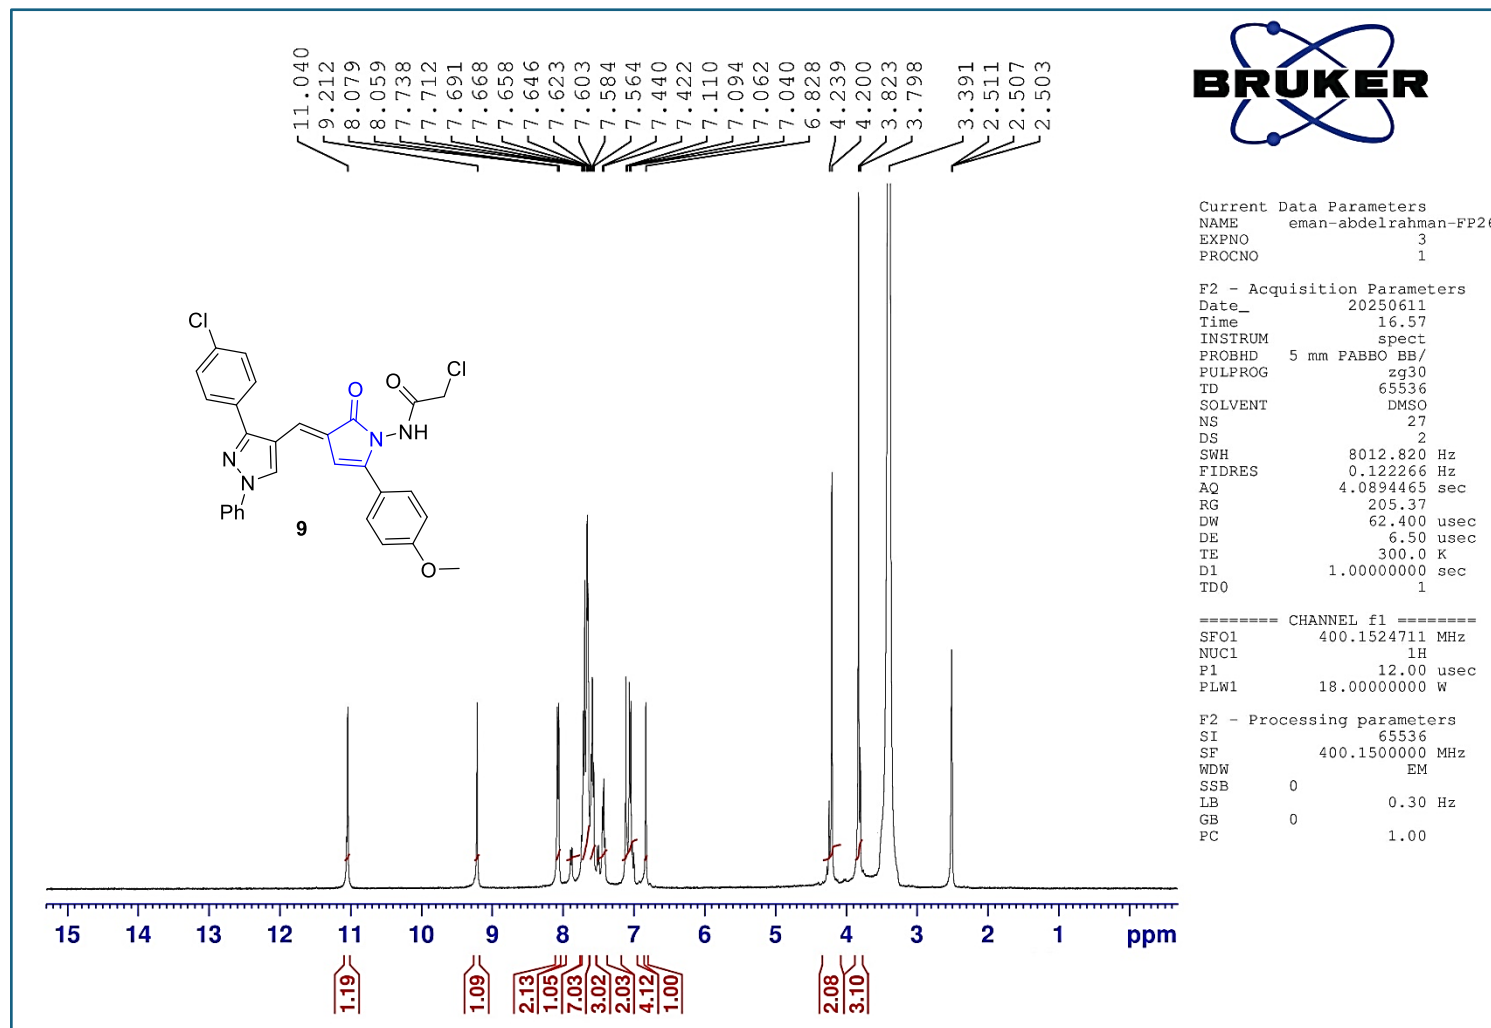

<sup>1</sup>H NMR spectrum (DMSO-*d*<sub>6</sub>) of compound 9

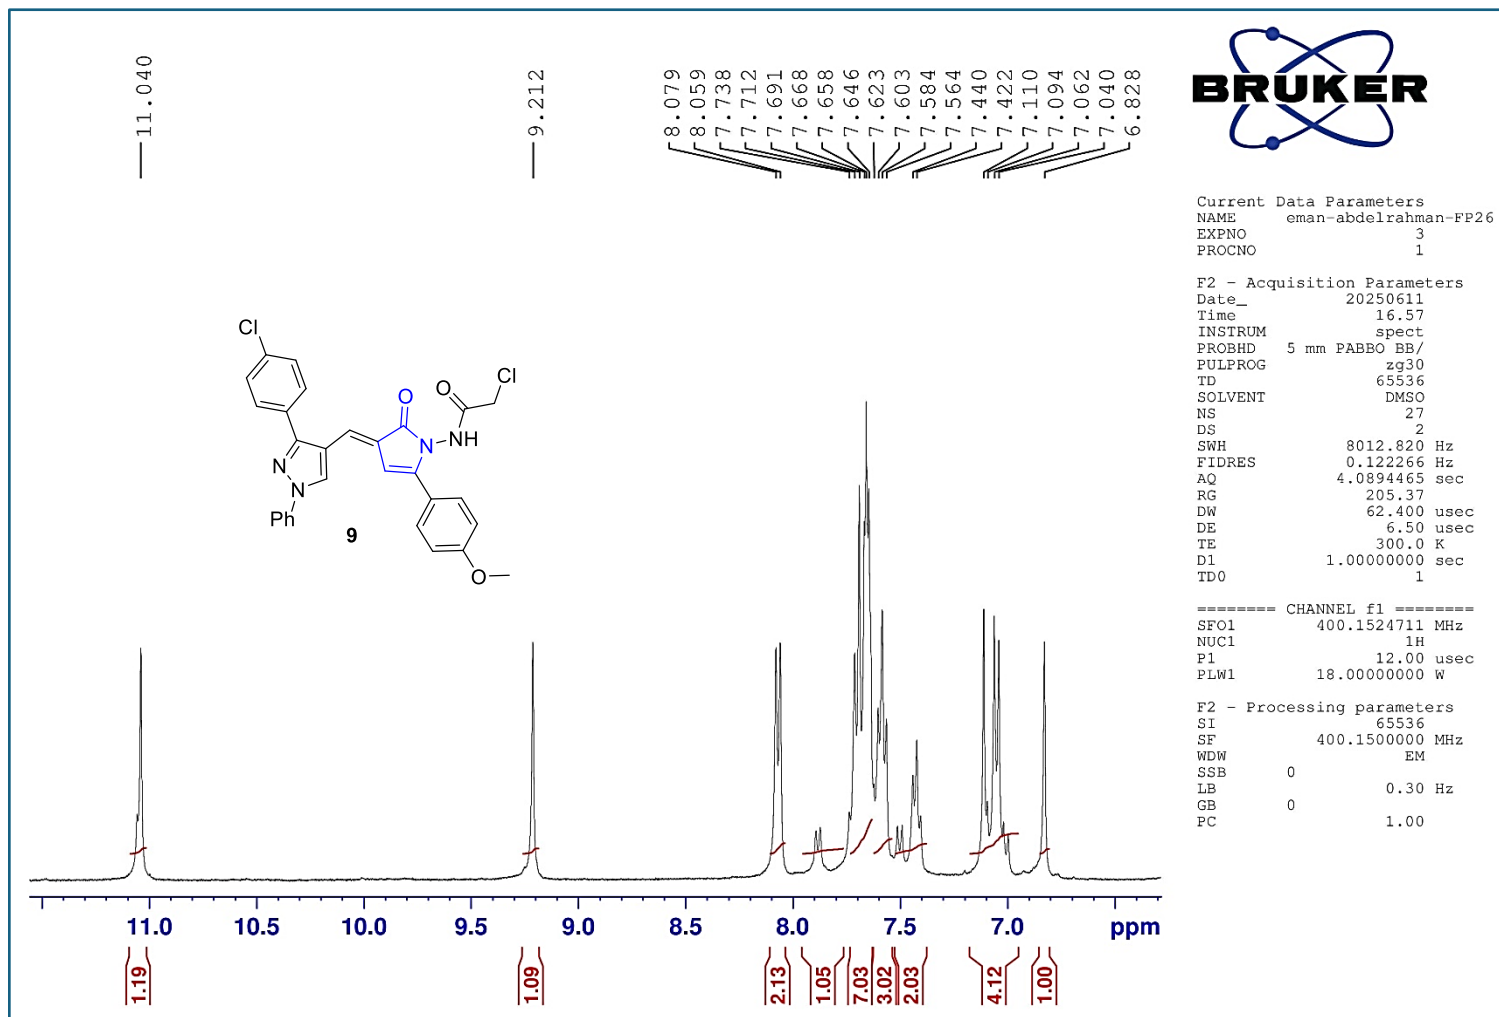

Cont.  $^1\text{H}$  NMR spectrum (DMSO- $d_6$ ) of compound 9

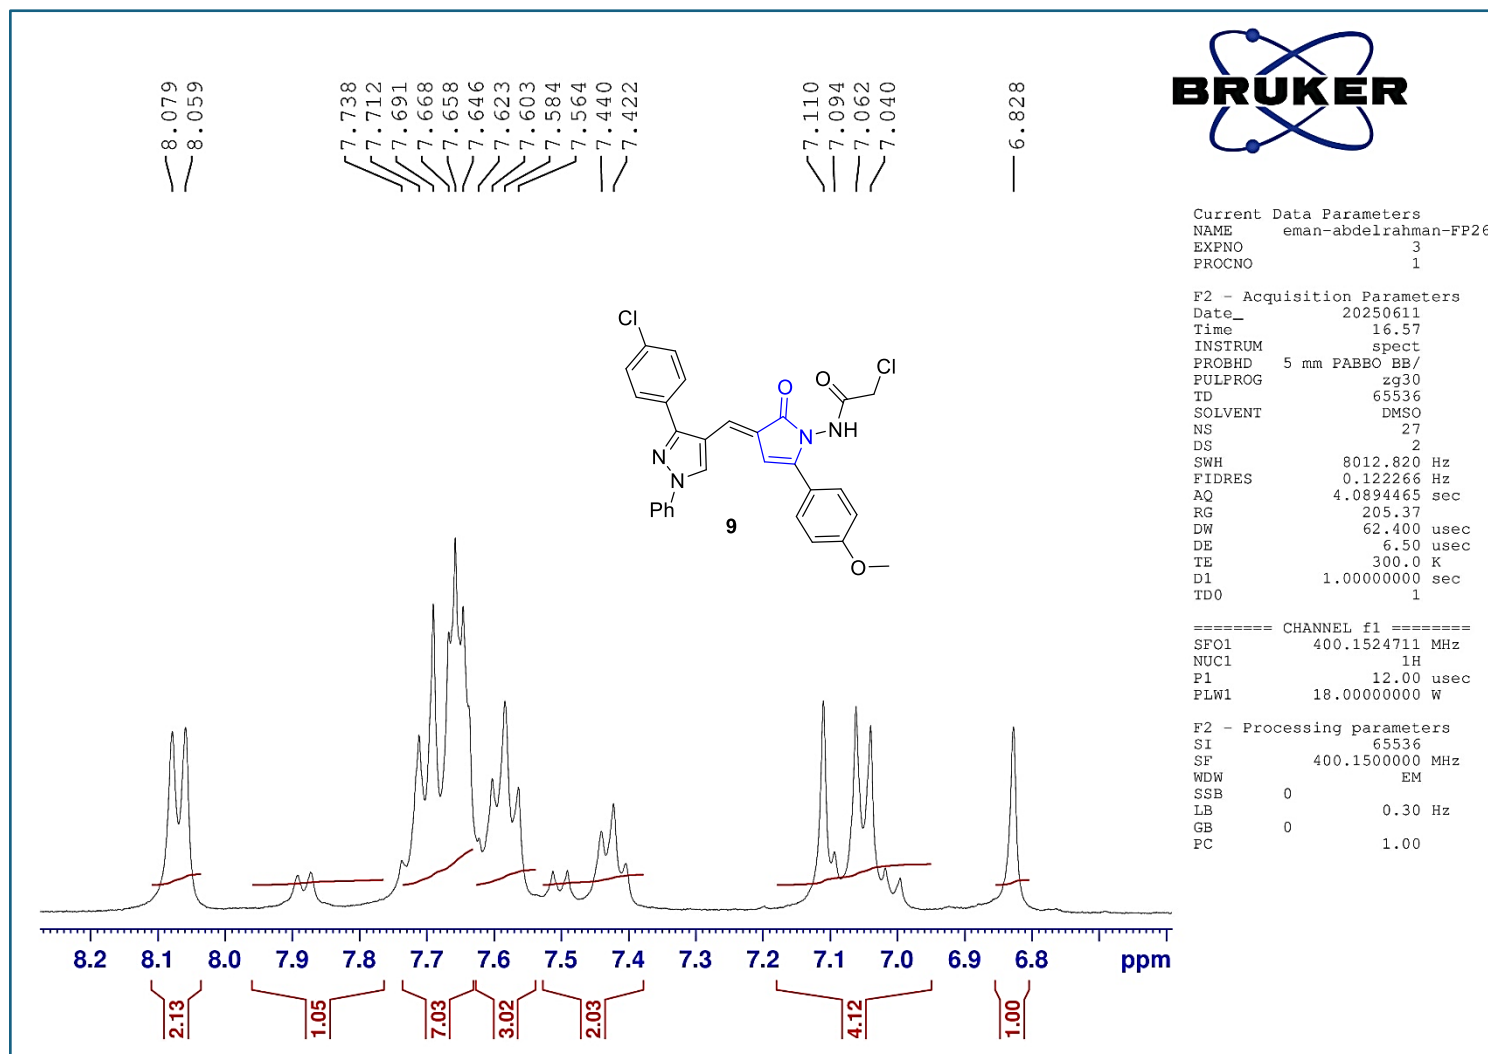

Cont.  $^1\text{H}$  NMR spectrum (DMSO- $d_6$ ) of compound 9

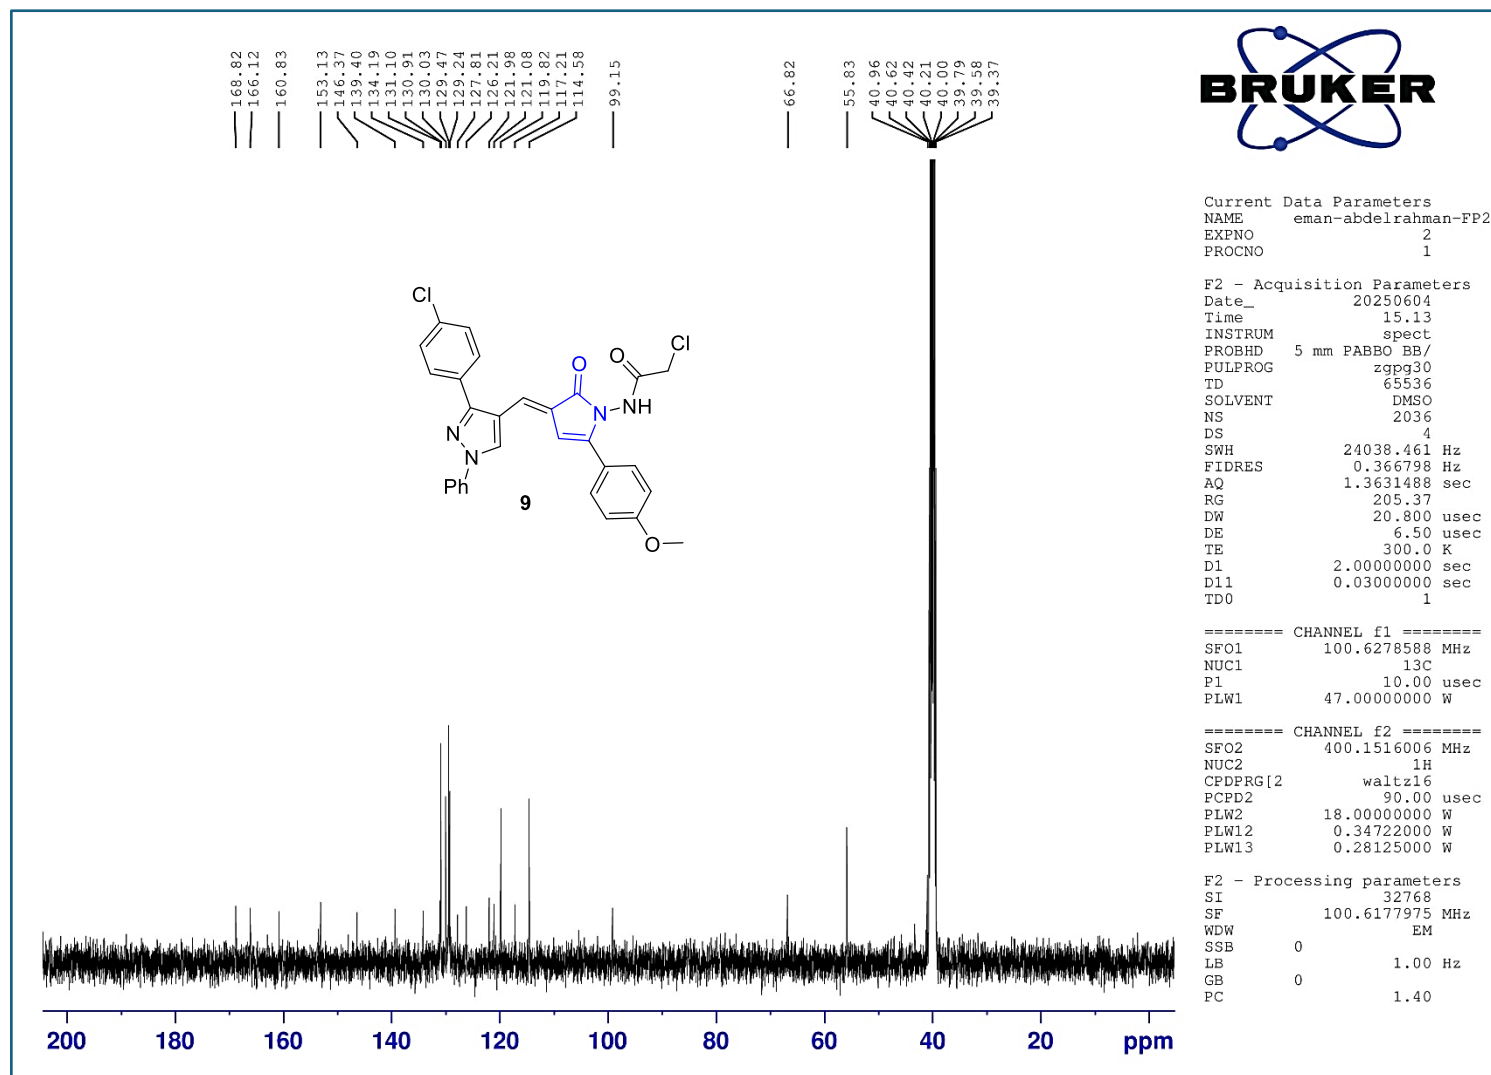

$^{13}\text{C}$  NMR spectrum (DMSO- $d_6$ ) of compound 9

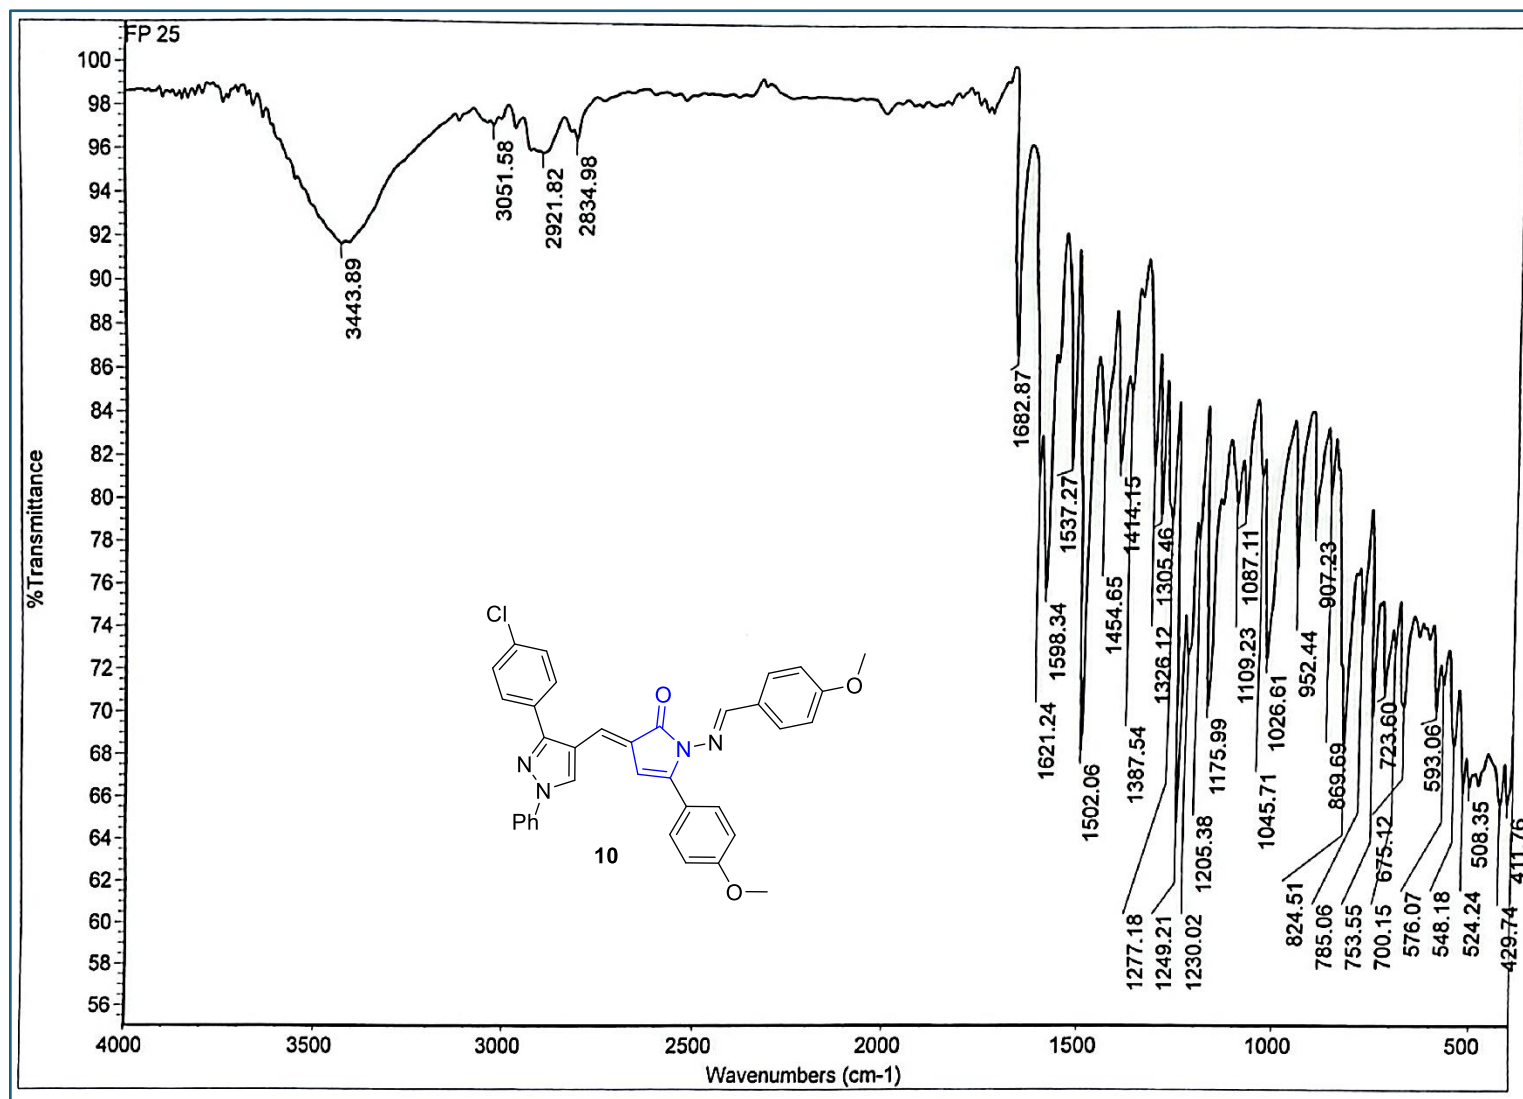

FT-IR spectrum of compound 10

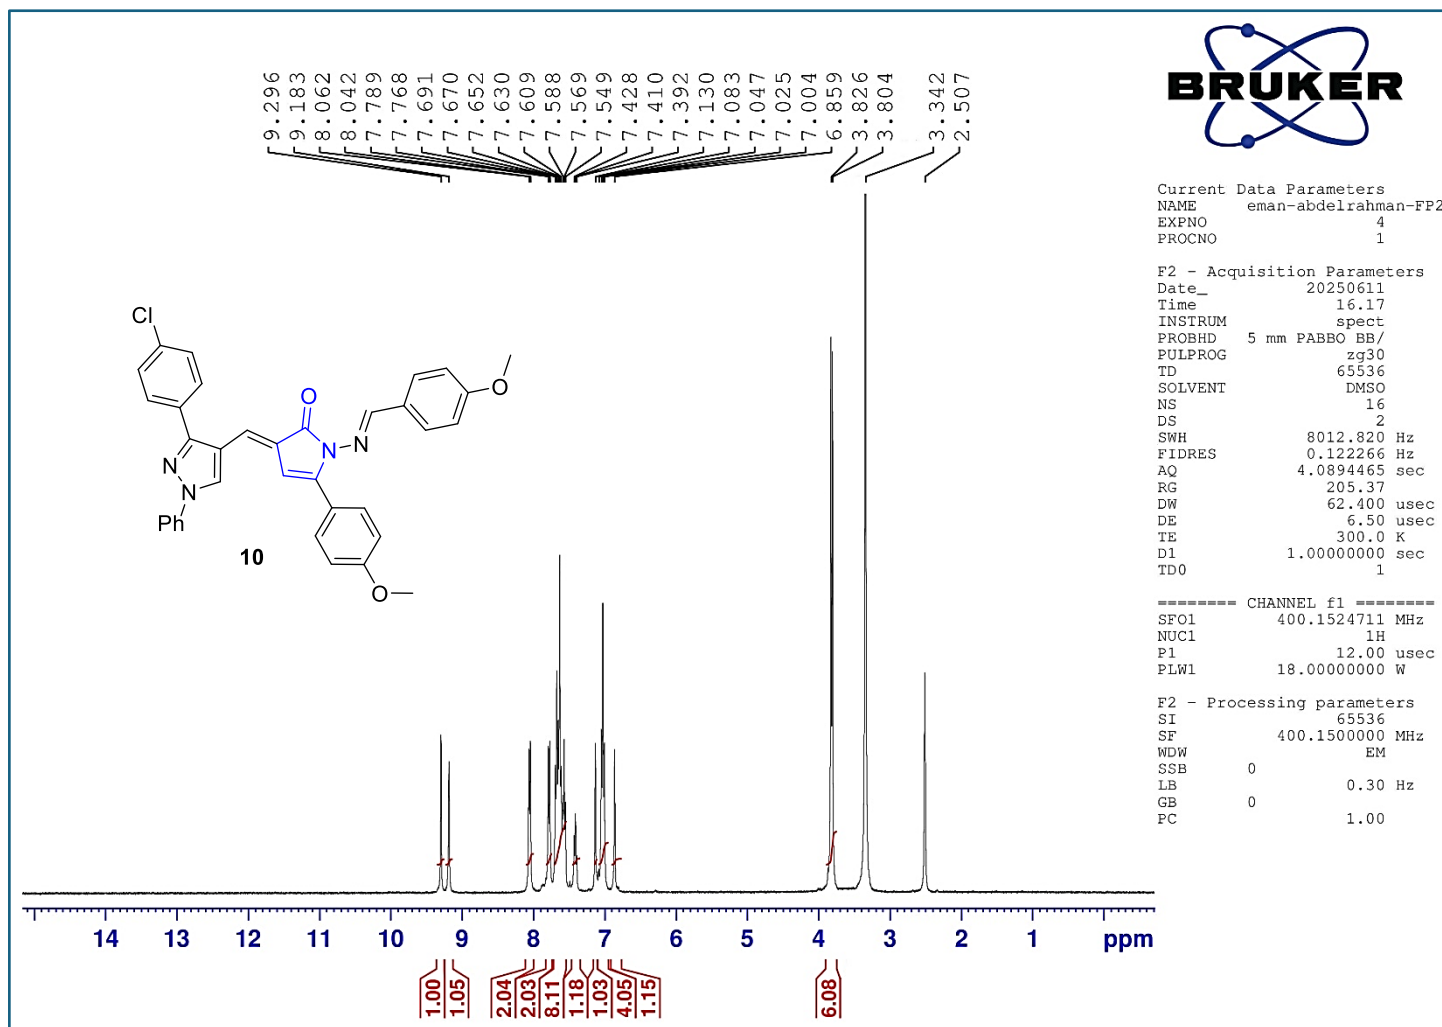

<sup>1</sup>H NMR spectrum (DMSO-*d*<sub>6</sub>) of compound 10

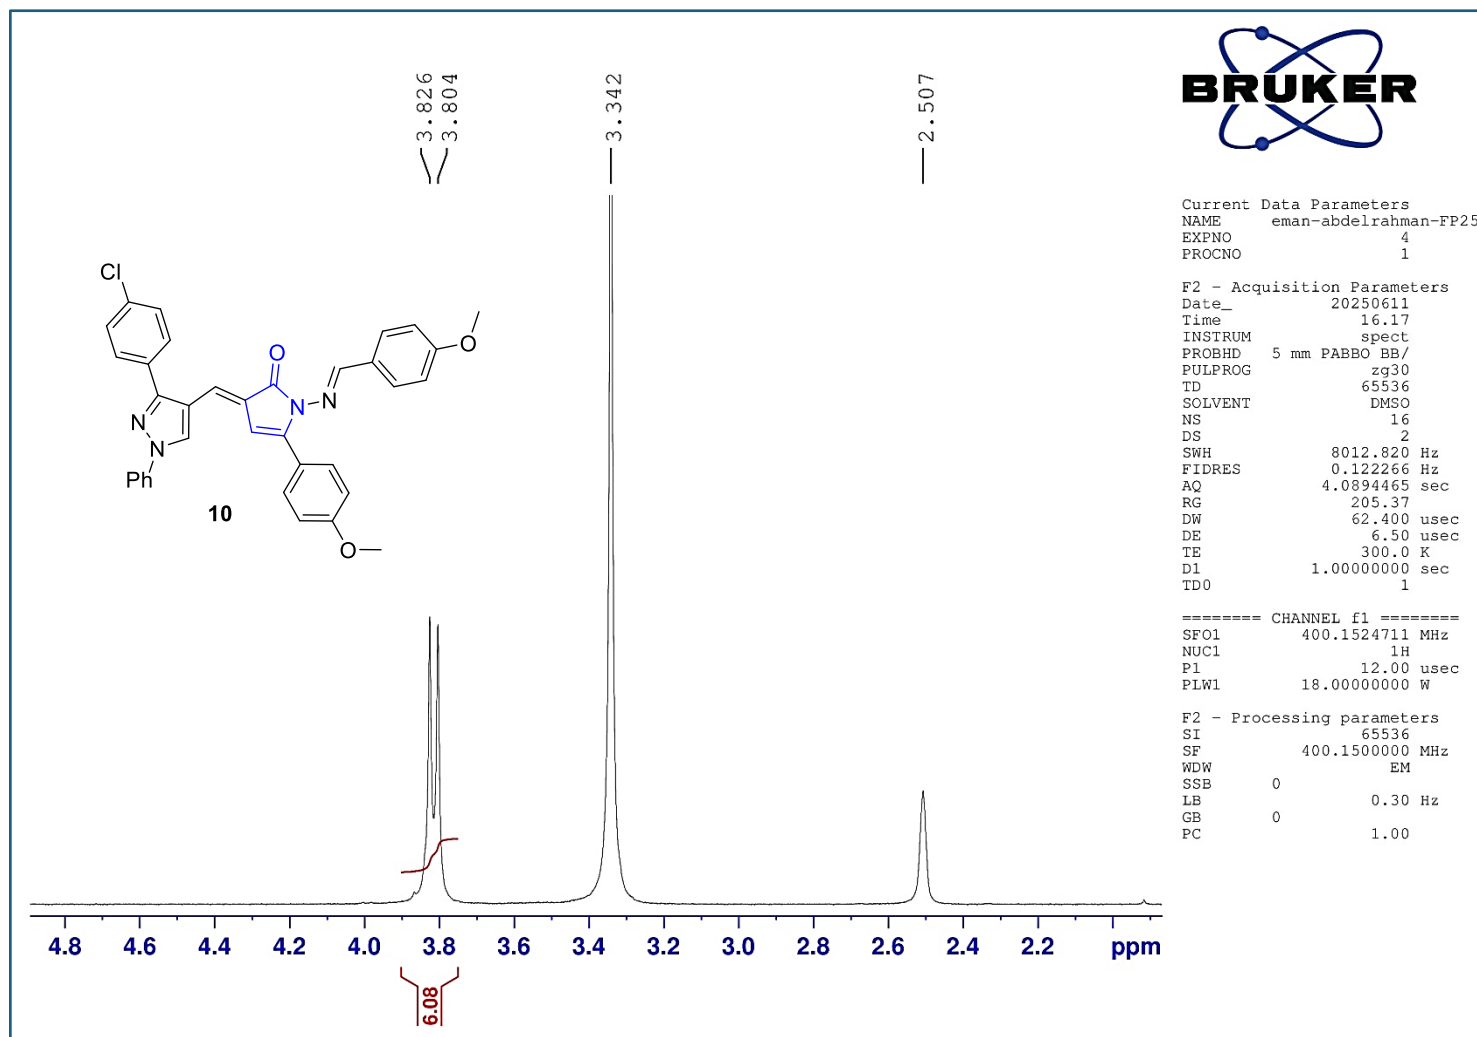

Cont.  $^1\text{H}$  NMR spectrum (DMSO- $d_6$ ) of compound 10

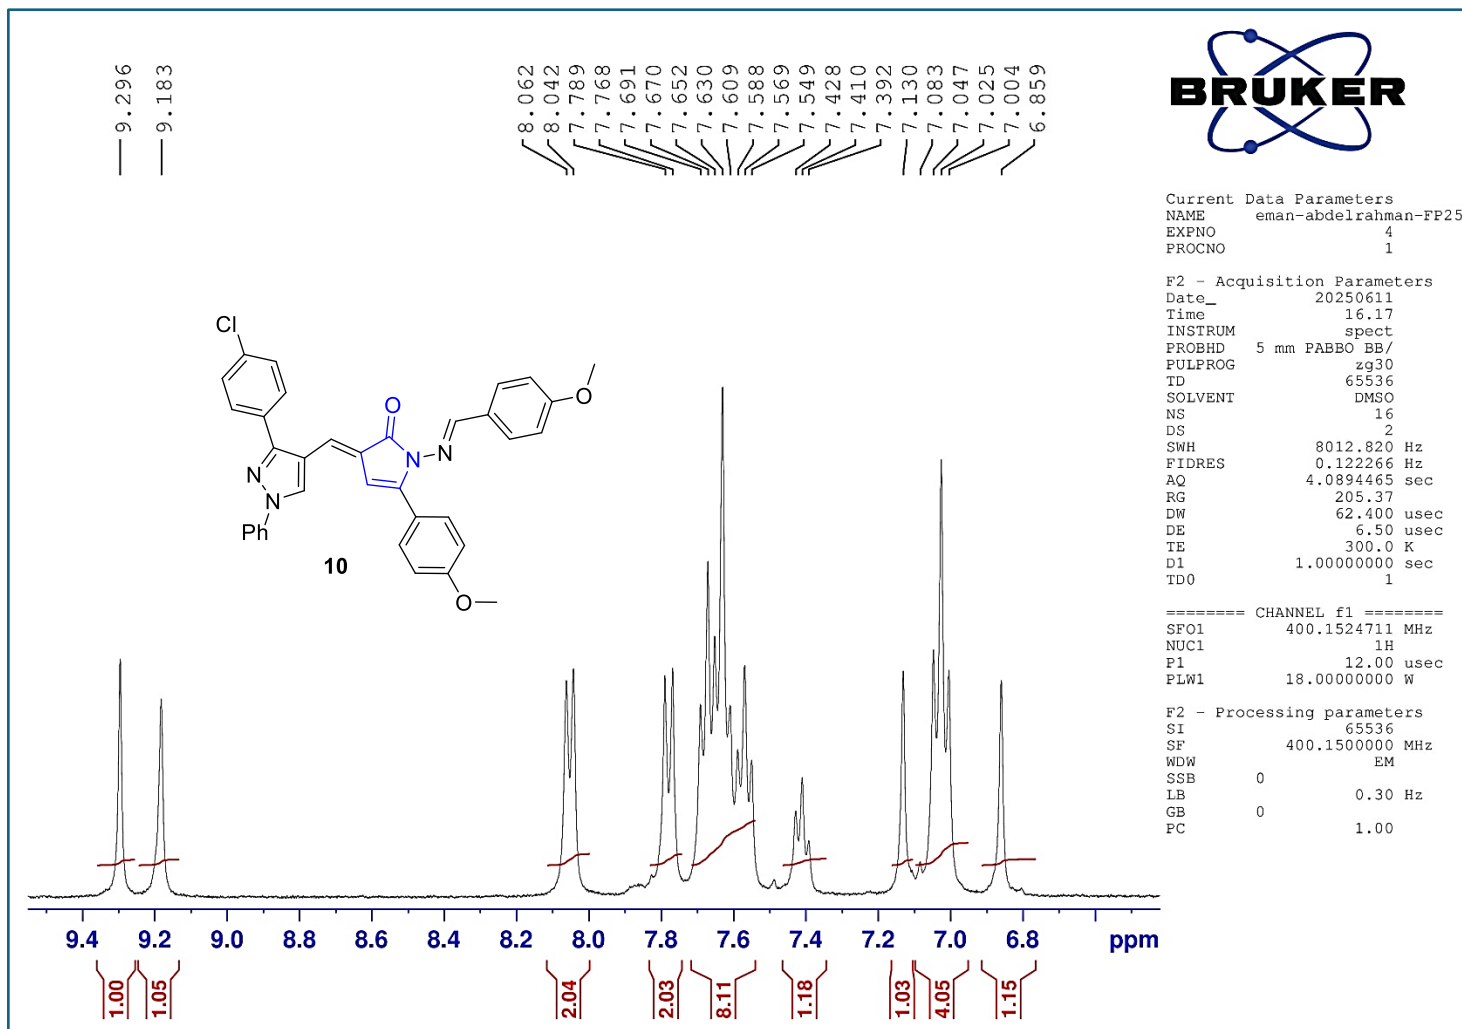

Cont. <sup>1</sup>H NMR spectrum (DMSO-*d*<sub>6</sub>) of compound 10
